# Supplementary material for: Extracting Cell Stiffness from Real-Time Deformability Cytometry: Theory and Experiment
Source: PubMed Central journal article supplement — Biophys J. 2015 Nov 17;109(10):2023–36. doi: 10.1016/j.bpj.2015.09.006 (PMC4656812; doi:10.1016/j.bpj.2015.09.006), 2015-11-17
Supplement: mmc2.pdf [file mmc2.pdf]

## Article

# Extracting Cell Stiffness from Real-Time Deformability Cytometry: Theory and Experiment

Alexander Mietke,<sup>1</sup> Oliver Otto,<sup>1</sup> Salvatore Girardo,<sup>1</sup> Philipp Rosendahl,<sup>1</sup> Anna Taubenberger,<sup>1</sup> Stefan Golfier,<sup>1</sup> Elke Ulbricht,<sup>1</sup> Sebastian Aland,<sup>2</sup> Jochen Guck,<sup>1</sup> and Elisabeth Fischer-Friedrich<sup>3,4,\*</sup>

<sup>1</sup>Biotechnology Center and <sup>2</sup>Institute of Scientific Computing, Technische Universität Dresden, Dresden, Germany; <sup>3</sup>Max Planck Institute of Molecular Cell Biology and Genetics, Dresden, Germany; and <sup>4</sup>Max Planck Institute for the Physics of Complex Systems, Dresden, Germany

**ABSTRACT** Cell stiffness is a sensitive indicator of physiological and pathological changes in cells, with many potential applications in biology and medicine. A new method, real-time deformability cytometry, probes cell stiffness at high throughput by exposing cells to a shear flow in a microfluidic channel, allowing for mechanical phenotyping based on single-cell deformability. However, observed deformations of cells in the channel not only are determined by cell stiffness, but also depend on cell size relative to channel size. Here, we disentangle mutual contributions of cell size and cell stiffness to cell deformation by a theoretical analysis in terms of hydrodynamics and linear elasticity theory. Performing real-time deformability cytometry experiments on both model spheres of known elasticity and biological cells, we demonstrate that our analytical model not only predicts deformed shapes inside the channel but also allows for quantification of cell mechanical parameters. Thereby, fast and quantitative mechanical sampling of large cell populations becomes feasible.

## INTRODUCTION

The stiffness of cells is an important phenotypical marker that can provide insights into cellular adaptation and differentiation as well as pathological changes of cells (1–6). Therefore, cell-mechanical phenotyping is an important contribution to biological research and medicine including applications in cell sorting and medical diagnostics (7–14).

Typical methods for the measurement of cell stiffness include atomic force microscopy (AFM) indentation, magnetic twisting cytometry, optical stretching, and others (15). Cell-mechanical studies based on these methods do not allow for a throughput much beyond one cell per minute. However, the population size and heterogeneity of cells in medical and biological samples requires high-throughput methods for classification and analysis. Recently, several microfluidic techniques have been introduced that start to address this need (13,16–18). Of these, deformability cytometry (DC) (13) and real-time DC (RT-DC) (17) deform cells purely by hydrodynamic interactions and without contact with channel walls. Although DC probes cells in an extensional flow at rates of thousands of cells per second, it operates in a dynamic regime of Reynolds numbers of  $\approx 50$ . This renders the calculation of associated flow fields a challenging, time-dependent, nonlinear problem. To

date, no analytical or numerical modeling has been applied to this method, which leaves the cell mechanical characterization purely phenomenological. By contrast, in RT-DC, somewhat smaller rates of hundreds of cells per second together with a more viscous carrier medium lead to a fluid flow at low Reynolds numbers ( $\approx 0.1$ ), making it amenable to theoretical analysis. In RT-DC measurements, suspended animal cells are advected by a shear flow through a microfluidic channel at a constant speed. In this process, cells are deformed due to the existence of strong velocity gradients within the channel cross section (17). A sketch of the measurement setup is depicted in Fig. 1 A. The observed deformation of initially spherical cells in the flow channel depends on cell stiffness, but it may also be influenced by flow speed, relative cell size, and internal cell architecture. To disentangle the influence of these parameters, it is necessary to quantify the stresses exerted on the cells in the shear flow and apply cell mechanical models to predict the resulting deformations.

Previous studies have presented extensive insight into the deformation of advected red blood cells and vesicles in cylindrical and square channels (19–21). Recent work has focused in particular on numerical solutions where underlying mechanical models anticipated either a fluid-like incompressible membrane with bending stiffness (22,23) or elastic microcapsules (23–26). An analytical approach to the elastic deformation of microcapsules in a linear shear flow was given by Barthès-Biesel (27), whereas Lighthill and Fitzgerald presented analytical studies of tight-fitting elastic pellets in terms of lubrication theory (28,29). However, to our knowledge, there exists as yet no full analytical derivation

Submitted April 27, 2015, and accepted for publication September 4, 2015.

\*Correspondence: [efischer@pks.mpg.de](mailto:efischer@pks.mpg.de)

This is an open access article under the CC BY-NC-ND license (<http://creativecommons.org/licenses/by-nc-nd/4.0/>).

Alexander Mietke's present address is Max Planck Institute for the Physics of Complex Systems, Dresden, Germany.

Editor: Gijsje Koenderink.

© 2015 The Authors

0006-3495/15/11/2023/14

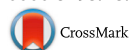

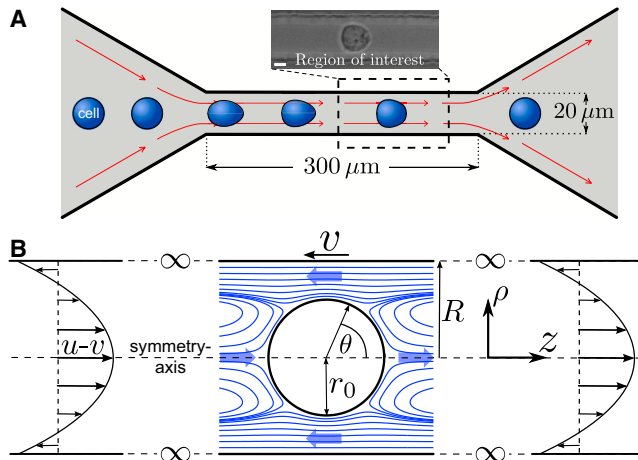

FIGURE 1 RT-DC setup and flow field around an advected sphere. (A) Channel geometry for RT-DC measurements is adapted from Otto et al. (17) (not to scale). Cells enter the flow channel, start to deform, and acquire a steady shape in the end portion of the channel. There, deformations of cells are measured with RT-DC. The inset representatively shows a deformed HL60 cell. The inset scale bar is  $5 \mu\text{m}$ . (B) Definition of comoving spherical coordinates  $(r, \theta)$  and cylindrical coordinates  $(\rho, z)$  with azimuthal symmetry. The sketch visualizes the boundary conditions at channel walls (no-slip),  $\mathbf{v}(R, z) = -v\mathbf{e}_z$ . At the inlet and outlet of the channel at  $z \rightarrow \pm \infty$ , we require that  $\mathbf{v}(\rho) = [u(R^2 - \rho^2)/R^2 - v]\mathbf{e}_z$  (Poiseuille flow). The fraction  $\lambda = r_0/R$  of channel radius  $R$  and sphere radius  $r_0$  defines the only independent parameter for this problem. Streamlines (blue) and thick arrows illustrate directions of the flow in different regions close to the advected sphere ( $\lambda = 0.6$ ). Note that in the comoving frame, some streamlines change direction and thus enter and exit on the same side of the image. To see this figure in color, go online.

for the elastic deformation of an elastic sphere and the deformation of a thin elastic shell in a cylindrical flow channel. Our perturbation approach of small deformations aims for simple analytical expressions that allow the extraction of scaling laws of the system and rapid fitting to experimental data.

We employ an analytical expansion of the Stokes equation to calculate the flow field around a spherical object advected by a flow in a cylindrical channel (30). The obtained flow field is used to derive hydrodynamic surface stresses acting on the spherical object for the situation of a uniform, force-free motion through the channel. Surface stresses are then prompted as a boundary condition into linear elasticity theory to calculate surface displacement fields of the spherical object. As cell mechanical models, we anticipate the scenario of either an elastic sphere or a thin elastic shell with or without surface tension. We verify our theoretical results by numerical simulations and experimentally by RT-DC measurements of agar beads and accompanying AFM indentation measurements. Finally, we present to our knowledge the first data on cell stiffness, as obtained from RT-DC measurements for a human promyelocytic cell line (HL60). This work constitutes a theoretical underpinning for high-throughput RT-DC experiments directly relating measured cell deformation to elastic parameters of the cell.

## MATERIALS AND METHODS

### Velocity measurements

We suspended commercially available polystyrene beads in a solution of phosphate-buffered saline (PBS) without  $\text{Mg}^{2+}$  and  $\text{Ca}^{2+}$  and 0.5% (w/v) methylcellulose (Sigma Aldrich, Hamburg, Germany), as used for cell measurements with RT-DC. The nominal diameters of the beads given by the manufacturer were (mean  $\pm$  SD)  $10.37 \pm 1.27 \mu\text{m}$  (118, Phosphorex, Hopkinton, MA), and  $12.27 \pm 0.12 \mu\text{m}$ ,  $15.21 \pm 0.31 \mu\text{m}$ , and  $19.3 \pm 0.36 \mu\text{m}$  (Q-F-0570, Q-F-KM194, and Q-F-KM223, Microparticles, Berlin, Germany), which covers a wide range of sizes that are still small enough to fit through the channel. The bead solution is driven through the channel by a high-precision syringe pump. Videos are taken using a high-speed camera built into a brightfield microscope and are later analyzed with custom-built tracking software. Further details of the experimental setup and the associated tracking software can be found in Otto et al. (17). After the flow rate of the bead suspension was set, we waited for 5 min before taking videos to ensure a stable and equilibrated flow of bead suspension. Employing the equivalent channel radius,  $R_{\text{eq}}$ , (Section S3 in the Supporting Material), tracked bead sizes were used to calculate the parameter  $\lambda = r_0/R$ , where  $r_0$  is the sphere's radius. Knowledge of channel dimensions (square channel cross section of width  $L$ ) and flow rate,  $Q$ , allows calculation of the central flow velocity,  $u$ , as (31)

$$u = K_2 \frac{Q}{L^2},$$

where  $K_2 \approx 2.096$ . Measured bead velocities,  $v$ , were normalized by the flow velocity,  $u$ , and plotted against the corresponding value of  $\lambda$ . Measurements were repeated and taken at two different flow rates (0.04 and 0.08  $\mu\text{L/s}$ ), consistently yielding results as shown in Fig. 2 B. Further details of the experimental setup can be found in Otto et al. (17).

### Preparation of agar beads

Agar beads were obtained by preparing an emulsion using an aqueous solution of low-gelling-point agarose (A0701, Sigma-Aldrich) as the dispersed phase and light mineral oil (330779, density 0.84 g/mL, viscosity 30 mPa·s, Sigma-Aldrich) with 2% (v/v) Span-85 surfactant (S7135,

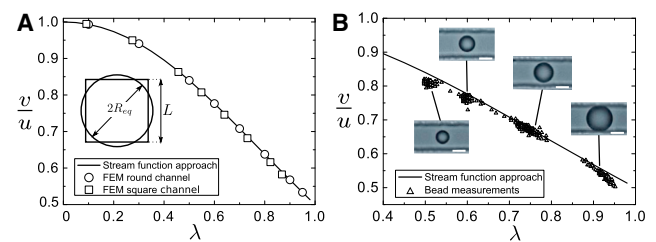

FIGURE 2 Theoretical and experimental equilibrium velocities of undeformed spheres. (A) Size dependence of the velocity ratio,  $v/u$ , where  $v$  is the equilibrium velocity of the sphere and  $u$  is the peak velocity of the Poiseuille flow in the channel. Velocity ratios were obtained from the stream-function approach (solid line), or from finite-element simulations in a cylindrical channel (circle) or a square channel (square). The cylindrical channel was chosen such that the equivalent channel radius condition,  $2R_{\text{eq}} = 1.094 \times L$  (inset), was satisfied (32). (B) Velocity measurement of polystyrene beads of different mean diameters (10.4  $\mu\text{m}$ , 12.3  $\mu\text{m}$ , 15.2  $\mu\text{m}$ , and 19.3  $\mu\text{m}$ ) being flushed through a microfluidic channel with a square cross section (width  $L = 20 \mu\text{m}$ ) using a high-precision syringe pump. The solid line depicts the solution derived from the stream-function approach. The graph contains 817 measurement points (triangles). The inset scale bars are  $10 \mu\text{m}$ . To see this figure in color, go online.

$M = 957.52$  g/mol, Sigma-Aldrich) as the continuous phase. Agarose solution was prepared by dissolving agarose powder at a concentration of 0.5% (w/w) in deionized water. The mixture was then placed for 3 min in a microwave oven. After a transparent solution was obtained, it was placed in a submersion water bath at 70°C, where it was held for at least 1 h to allow air bubbles to escape. The continuous phase was poured into a beaker on a magnetic stirrer (VMS-C4, VWR International, Darmstadt, Germany) with a stirring rate of 1250 rpm. Agar solution at 70°C (100  $\mu$ L) was pipetted into the oil, 1% (v/v), and vortexed for 40 s at room temperature, generating agar beads with a diameter between 2 and 50  $\mu$ m. Afterward, the bead solution was poured in a 15 mL centrifuge tube and stored in a refrigerator for 1 h. After overnight sedimentation, the oil was removed and substituted with 2 mL of metacellulose solution, after three washings with 2% w/v poly(ethylene glycol)monooleate (460176, density 1.034 g/mL,  $M = 860$  g/mol, Sigma-Aldrich) aqueous solution. The final bead concentration was adjusted by pipetting 200  $\mu$ L taken from the top of the solution in 1 mL of metacellulose solution. The metacellulose solution was prepared by dissolving methylcellulose (M 0512,  $M = 88,000$  g/mol, Sigma-Aldrich) at a concentration of 1% (w/v) in PBS, with a final dilution of 50% in 2% w/v poly(ethylene glycol)monooleate aqueous solution.

### HL60 cells

The HL60 cell line was cultured according to the methods of Otto et al. (17). To prepare the cell suspension for RT-DC measurements, cells were centrifuged at 115  $g$  for 5 min (Eppendorf 5805 R, Eppendorf, Hamburg, Germany) and resuspended in a solution of PBS (without  $Mg^{2+}$  and  $Ca^{2+}$ ) and 0.5% (w/v) methylcellulose (Sigma Aldrich) to a final concentration of  $10^6$  cells/mL. For the deformation measurements, cells were taken during log phase, ~36 h after splitting.

### Shape fitting

Deformed shapes were tracked and transformed to polar representations,  $q_m(\theta_i)$ , at 50 equidistant angles,  $\theta_i$ . To exclude tracking of nonsymmetric deformations with respect to the flow axis (e.g., due to imperfect spatial cell focusing), the upper-half area,  $A_U$ , and lower-half area,  $A_L$ , of the contours were calculated, and only objects with  $|1 - A_U/A_L| < 0.005$  were used for shape fitting. Objects with  $A = A_U + A_L > 180 \mu m^2$  ( $\lambda_{ECR} \approx 0.7$ ) were not considered for shape fitting, to avoid the influence of channel boundary effects on the deformation. Assuming volume conservation ( $\nu = 0.5$ ) and a rotationally symmetric shape, we calculate  $\lambda$  with respect to the equivalent channel radius. At this point, the elasticity modulus,  $E$ , and the positioning of the theoretical shape over the tracking data (two coordinate parameters  $(x, y)$ ) are the only remaining fitting parameters. For each value  $E$  and position  $(x, y)$  tested, deformed shapes,  $q_i^E(\theta)$ , predicted by our theories were calculated and sampled at angles  $\theta_i$  in the same coordinate system as the tracked shape. Minimization of the residual  $r(E) = \sum |q_m(\theta_i) - q_i^E(\theta_i)|^2$  was achieved by using the nonlinear regression routine provided by MATLAB R2012b ([www.mathworks.com](http://www.mathworks.com)). We employed the robust fitting method with an iterative bisquare weighting to reduce the impact of outliers in the tracked shapes. Relative symmetric 95% confidence intervals (fitting errors) of the elastic parameters ranged from 5% to 40%.

## RESULTS

We study a simple cell mechanical model where suspended cells are regarded as linearly elastic, isotropic objects with a spherical reference shape. To derive cell stiffness from cell deformation in the flow channel, we pursue a perturbation approach where we only consider contributions to the first

order in elastic strain. This approach is equivalent to a first-order approximation in terms of the flow rate,  $Q$ , through the channel, as small flow rates correspond to the case of small surface stresses on the sphere (see Section S1 in the [Supporting Material](#)). As a perturbation parameter, we introduce a dimensionless flow rate,  $\hat{Q} = \eta Q/ER^3$ . Here,  $\eta$  is the viscosity of the carrier medium,  $R$  is the channel radius, and  $E$  is the sphere's Young's modulus. Our perturbation calculation takes into account terms up to the first order in  $\hat{Q}$ . Therefore, errors of our solution scale with  $\hat{Q}^2$  or alternatively with  $\epsilon^2$ , where  $\epsilon$  denotes the elastic strain. Accordingly, we will use in our calculations the linearized expression of the elastic strain tensor and we will neglect the feedback of the elastic deformation onto the flow field (see Section S1).

### Calculation of the flow field around a sphere advected in a cylindrical channel

We model the problem of a cell in an RT-DC setup as a sphere advected in a cylindrical flow channel at constant velocity. To determine the hydrodynamic stresses acting on this sphere, we calculate the surrounding flow field. Reynolds numbers of the flows involved in RT-DC measurements are typically on the order of 0.1, and therefore, they are dominated by viscous forces. To describe the velocity distribution of the fluid flow, we solve the Stokes equation in a cylindrical channel for a Newtonian fluid together with the incompressibility condition:

$$\nabla p - \eta \nabla^2 \mathbf{v} = 0 \quad (1)$$

$$\nabla \cdot \mathbf{v} = 0. \quad (2)$$

Here,  $\eta$  is the dynamic viscosity of the fluid, and  $\mathbf{v}$  and  $p$  are its velocity and pressure fields, respectively. For the purpose of our calculation, we consider a sphere of radius  $r_0$  that is advected in the center of an infinitely long cylindrical tube of radius  $R$  at constant speed (Fig. 1 B). No-slip boundary conditions are imposed on the surface of the sphere and the cylinder walls. As boundary conditions for the flow profile at the channel inlet and outlet, i.e., at  $z = \pm\infty$ , we impose a Poiseuille flow (31), as the presence of the sphere is not relevant there.

For our calculation, we choose coordinates that are co-moving with the sphere (Fig. 1 B). To adapt to the given domain boundaries (surface of the sphere, cylinder walls, and channel ends), cylindrical coordinates  $(\rho, z, \varphi)$  and spherical coordinates  $(r, \theta, \varphi)$  are employed alternately (30). The axial symmetry around the cylinder axis allows definition of a unique stream function,  $\Psi(r, \theta)$ , such that the components of the flow field,  $\mathbf{v}$ , read (33)

$$v_r = \frac{1}{r^2 \sin \theta} \frac{\partial \Psi}{\partial \theta} \quad (3a)$$

$$v_\theta = -\frac{1}{r \sin \theta} \frac{\partial \Psi}{\partial r}. \quad (3b)$$

The contour lines of  $\Psi$  are the streamlines of  $\mathbf{v}$ . Therefore, the stream function  $\Psi$  encodes all the information of the flow field around the spherical object. Equations 1 and 2 lead to a single partial differential equation in  $\Psi$ , which is solved taking into account the described boundary conditions (30). The additional constraint of a vanishing net force acting on the sphere at steady state yields the velocity at which it passes through the channel (see Appendix A). We find that for this setting, the stream function,  $\Psi$ , and therefore the flow field, is uniquely parameterized by the relative sphere size,  $\lambda = r_0/R$ , where  $r_0$  is the sphere's radius and  $R$  is the channel radius.

### Equilibrium velocity of an undeformed sphere in theory and experiment

Fig. 2 A shows the normalized steady-state velocity function,  $v/u$ , of an undeformed sphere in a cylindrical channel, where  $v$  is the advection velocity of the sphere and  $u$  is the peak velocity of the Poiseuille flow in the channel. The latter is related to the total flow rate,  $Q$ , by  $u \propto Q/R^2$ . Velocities derived from the analytical theory (*solid line*) and from finite-element simulations (*circles*) using COMSOL Multiphysics ([www.comsol.com](http://www.comsol.com)) are in good agreement. Furthermore, we employed finite-element simulations to investigate whether a similar relation can be found in a channel with a square cross section and how those results compare to the flow field in the cylindrical channel (see Fig. 2 A, *squares*). For this comparison, we map the flow in the square channel onto the flow in a cylindrical channel with radius  $R_{\text{eq}}$ , which is the so-called equivalent channel radius (32). This radius is chosen such that there is the same pressure drop along the cylindrical channel and the channel with square cross section (see Section S3). To test these predictions experimentally, we used commercially available polystyrene beads of different sizes and flushed them through a microchannel with a square cross section of  $L = 20 \mu\text{m}$  width (see [Materials and Methods](#)). The results of the velocity measurements are shown in Fig. 2 B. The measured normalized bead velocities show good quantitative agreement with normalized velocities,  $v/u$ , as derived from the stream-function approach, using the equivalent channel radius,  $R_{\text{eq}}$ . Deviations of experimental results from the theoretical predictions for  $\lambda < 0.55$  are presumably due to an imperfect centering of the beads in the flow channel. The increasing deviation for  $\lambda > 0.9$  is due to the use of the equivalent channel radius, which leads to  $\lambda_{\text{eq}} \approx 0.91$  for a bead diameter of the size of the channel width. Therefore, beads with a relative cell size  $> 0.91$  are expected to have direct contact with the channel walls. Hence, our approach of deriving the flow profiles around the sphere is correct within a useful range of  $\lambda$ .

### Hydrodynamic stress acting on the sphere's surface

For a velocity field,  $\mathbf{v}$ , of an incompressible Newtonian fluid with viscosity  $\eta$ , the hydrodynamic stress tensor is given in Cartesian coordinates by

$$\sigma_{ij}^{\text{H}} = -p\delta_{ij} + \eta \left( \frac{\partial v_j}{\partial x_i} + \frac{\partial v_i}{\partial x_j} \right).$$

Due to the no-slip boundary condition, we have  $\mathbf{v} = 0$  and  $\partial_\theta v_i = 0$  on the surface of the sphere. Together with the incompressibility condition (Eq. 2), this implies also  $\partial_r v_r = 0$  at  $r = r_0$ . Further taking into account the azimuthal symmetry, the hydrodynamic stress components on the surface of the sphere read

$$\sigma_{rr}^{\text{H}}|_{r=r_0} = -p \quad (4a)$$

$$\sigma_{r\theta}^{\text{H}}|_{r=r_0} = \eta \frac{\partial v_\theta}{\partial r}|_{r=r_0}. \quad (4b)$$

Using Eqs. 1, 3, and 4, we find that the hydrodynamic stress is given in the form

$$\sigma_{rr}^{\text{H}}|_{r=r_0} = \sigma_c \sum_{\substack{n=1 \\ n \text{ odd}}}^{\infty} f_n P_n(\cos \theta) \quad (5a)$$

$$\sigma_{r\theta}^{\text{H}}|_{r=r_0} = \sigma_c \sum_{\substack{n=1 \\ n \text{ odd}}}^{\infty} g_n \frac{dP_n(\cos \theta)}{d\theta}, \quad (5b)$$

where  $P_n(\cos \theta)$  denotes the  $n$ th Legendre polynomial. The coefficients  $f_n$  and  $g_n$  are linear functions of the expansion coefficients of the stream function,  $\Psi$  (see Appendix A). Note that  $f_n = g_n = 0$  for even  $n$ , which reflects the symmetry of the flow field.

Although the stress components scale with the characteristic stress,  $\sigma_c = \eta v/r_0$ , their value changes along the sphere's surface depending on the polar angle,  $\theta$ . The expansion coefficients  $f_n$  and  $g_n$  quickly converge to zero for increasing  $n$  (see Fig. S2), implying that the stress components are dominated by the first few Legendre polynomials or their derivatives, respectively.

In Fig. 3, A and B, we depict the normal and tangential surface stresses for an undeformed sphere with  $\lambda = 0.7$  and typical experimental parameters. As for the steady-state velocity, we used the finite-element simulations to confirm the analytical results from the stream-function approach numerically (Fig. 3 B). Normal stresses are highest at the rear and front of the sphere and antisymmetric with respect to  $\theta = \pi/2$ . This behavior corresponds to a pushing from the back and an equal pulling at the front, which can be understood by the fact that in a steady-state situation, the peak



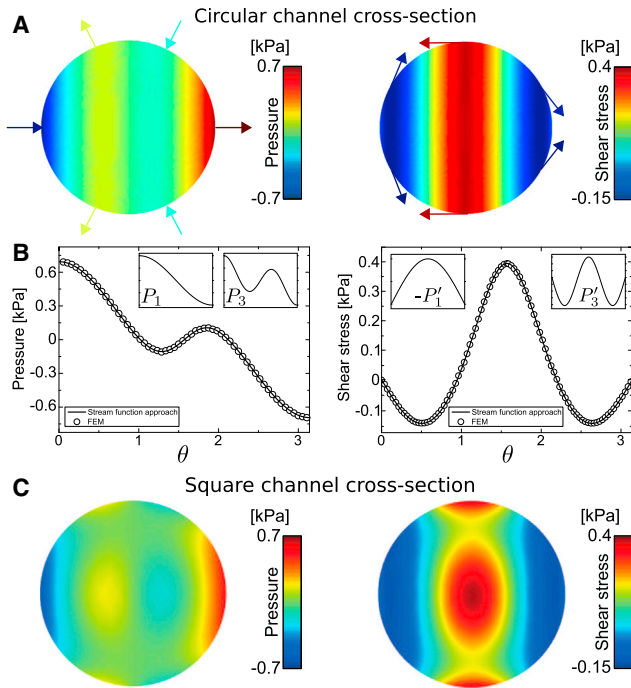

FIGURE 3 Surface stresses on an undeformed sphere passing through channels of circular and square cross section. (A) Hydrodynamic pressure (normal stress, *left*) and hydrodynamic shear stress (*right*) for  $Q = 0.012 \mu\text{L/s}$ ,  $\eta = 15 \text{ mPa}\cdot\text{s}$  (typical experimental parameters used for RT-DC),  $R = 10 \mu\text{m}$ , and  $r_0 = 7 \mu\text{m}$ . Arrows depict the direction of locally applied forces. Forward-directed normal forces are highest at surface regions close to the symmetry axis, and backward-directed shear forces are highest at surface regions close to the cylinder wall. (B) Comparison of the solution presented in (A) (*solid line*) with a finite-element simulation (*circles*) in dependence of the polar angle  $\theta$ . Insets depict the first two Legendre polynomials that appear in the expansion of the respective stress component. (C) Surface stresses from the finite-element simulation on a sphere passing through a channel with a square cross section of  $20 \mu\text{m}$  width (channel walls are parallel and perpendicular to the plane of projection). Peak normal and tangential surface stresses reach values of  $\sim 0.5 \text{ kPa}$  and  $0.4 \text{ kPa}$ , respectively. Values are shown for a situation identified with (A) using the equivalent channel radius ( $r_0 = 7.6 \mu\text{m}$ ), with  $\eta$  and  $Q$  as in (A) and (B).

velocity,  $u$ , of the flow is greater than the velocity of the sphere,  $v$ . The highest tangential stresses occur at regions closest to the cylinder walls as a result of the no-slip conditions on the sphere and the channel walls. Those boundary conditions produce shear rates of order  $v/(R - r_0)$  at sphere surface regions close to the cylinder walls. This consequently leads to very high shear stresses for larger spheres, where  $1 - \lambda$  becomes small (Fig. S3). The shear stress acts tangentially on the surface of the sphere and imposes a drag force,  $F_d$ , opposite to the flow direction. The net balance between this backward drag and the forward driving normal pressure forces,  $F_p$ , then leads to the force-free, uniform motion of the sphere, i.e.,  $F_p + F_d = 0$ .

By choosing a rotationally symmetric description, we implicitly neglect small azimuthal surface stresses,  $\sigma_{r\varphi}$ , that are present in a square channel. Hydrodynamic shear stresses,  $\sigma_{r\theta}(r = r_0)$ , in channels with square cross section

are similar in their stress peak values when compared to results in a cylindrical channel using the equivalent channel radius (see Fig. 3 C).

### Elastic deformation of a sphere advected in a cylindrical channel

Since the cells reach a steady-state shape toward the end of the flow channel (17), we choose to describe those shapes by time-independent, i.e., elastic, material parameters. The assumption of isotropic and linear elastic material properties additionally simplifies the theoretical treatment. We solve the general deformation problem and adapt the solution to boundary conditions that are provided by the previously calculated hydrodynamic surface stresses (Eq. 5). This approach corresponds to a perturbation expansion, where higher-order contributions coming from the feedback of the deformation onto the flow field around the object are neglected (see Section S1). The deformation of the sphere is given in terms of a displacement field,  $\mathbf{u} = u_r \mathbf{e}_r + u_\theta \mathbf{e}_\theta$ , such that the deformed surface is described by  $\mathbf{r}(\theta, \varphi) = \mathbf{r}_0 + \mathbf{u} = (r_0 + u_r) \mathbf{e}_r + u_\theta \mathbf{e}_\theta$ . As we aim for a description of suspended animal cells in flow channels, we will take into account different possible architectures of the spherical object corresponding to different cell mechanical models.

#### Solid elastic sphere

First, we consider a solid elastic sphere advected at a constant velocity in the cylindrical channel. This scenario corresponds to the case of a dominant, homogeneous cell bulk in the process of deformation. Due to the absence of external volume forces, the equilibrium equation inside the sphere reads (34)

$$\nabla \cdot \boldsymbol{\sigma} = 0, \quad (6)$$

where

$$\boldsymbol{\sigma} = G \left[ \nabla \mathbf{u}^T + \nabla \mathbf{u} + \frac{2\nu}{1 - 2\nu} (\nabla \cdot \mathbf{u}) \mathbb{I} \right]. \quad (7)$$

Here,  $G$  and  $\nu$  are the shear modulus and the Poisson ratio of the material, respectively. Using a Papkovitch Neuber ansatz (see Section S6), we can find general solutions to Eq. 6 of the form (35)

$$u_r(r, \theta) = \sum_{n=1}^{\infty} [a_n(n+1)(n-2+4\nu)r^{n+1} + b_n n r^{n-1}] P_n(\cos\theta) \quad (8a)$$

$$u_\theta(r, \theta) = \sum_{n=1}^{\infty} [a_n(n+5-4\nu)r^{n+1} + b_n n r^{n-1}] \frac{dP_n(\cos\theta)}{d\theta}. \quad (8b)$$

The above displacement field allows calculation of an associated elastic stress tensor,  $\boldsymbol{\sigma}$ . Boundary conditions require that this elastic stress equals the hydrodynamic stress in Eq. 5 on the surface of the sphere. This condition determines the constants  $a_n$  and  $b_n$  (see Appendix B). On the surface of the sphere, we denote the displacement field as

$$u_r|_{r=r_0} = \sum_{n=1}^{\infty} \alpha_n^{\text{sp}} P_n(\cos \theta) \quad (9a)$$

$$u_\theta|_{r=r_0} = \sum_{n=1}^{\infty} \beta_n^{\text{sp}} \frac{dP_n(\cos \theta)}{d\theta}, \quad (9b)$$

where the constants  $\alpha_n^{\text{sp}}$  and  $\beta_n^{\text{sp}}$  follow from Eq. 8, setting  $r = r_0$  (see Appendix B).

#### Thin elastic shell

In the following, we consider the cell as a thin elastic, incompressible shell immersed in the shear flow. This is motivated by the actin cortex being the dominant mechanical element of the cell, as suggested by previous measurements (36).

We assume a shell of thickness  $h \ll r_0$  with Young's modulus  $E$ . In such a shell, the bending energy,  $E_B$ , is small compared to the stretching energy,  $E_S$ , of the shell surface; in fact,  $E_B/E_S \propto (h/r_0)^2 \ll 1$ . The stretching energy is given by the surface integral (34):

$$E_S = \pi r_0^2 \int_0^\pi \left[ \frac{Eh}{1-\nu^2} (\epsilon_{\varphi\varphi}^2 + \epsilon_{\theta\theta}^2 + 2\nu\epsilon_{\varphi\varphi}\epsilon_{\theta\theta}) \right] \sin \theta d\theta.$$

Furthermore, we have to consider the potential energy,  $E_P$ , of the shell (37) that is altered by a displacement,  $\mathbf{u}$ , of a surface element,  $d\mathbf{A}$ , as a result of the hydrodynamic loading,  $\boldsymbol{\sigma}^H$

$$\begin{aligned} E_P &= - \int \mathbf{u} \cdot \boldsymbol{\sigma}^H \cdot d\mathbf{A} \\ &= 2\pi r_0^2 \int_0^\pi \left[ -(\sigma_{rr}^H u_r + \sigma_{r\theta}^H u_\theta) \right] \sin \theta d\theta. \end{aligned}$$

Combining expressions of stretching energy and potential energy, we find the total energy of a thin elastic shell  $E_{\text{sh}} = E_S + E_P$ , which yields the final Euler equations for the displacement fields  $u_r$  and  $u_\theta$ :

$$\frac{\delta E_{\text{sh}}}{\delta u_r} = 0 \Rightarrow \frac{1}{r_0^2} \frac{Eh}{1-\nu} (2u_r + u'_\theta + u_\theta \cot \theta) - \sigma_{rr}^H = 0 \quad (10)$$

$$\begin{aligned} \frac{\delta E_{\text{sh}}}{\delta u_\theta} = 0 \Rightarrow \frac{1}{r_0^2} \frac{Eh}{1-\nu^2} (u_\theta \cot^2 \theta + \nu u_\theta \\ - (1+\nu)u'_r - u''_\theta - u'_\theta \cot \theta) - \sigma_{r\theta}^H = 0. \end{aligned} \quad (11)$$

We use the ansatz

$$u_r = \sum_{n=2}^{\infty} \alpha_n^{\text{sh}} P_n(\cos \theta) \quad (12a)$$

$$u_\theta = \sum_{n=1}^{\infty} \beta_n^{\text{sh}} \frac{dP_n(\cos \theta)}{d\theta}, \quad (12b)$$

where the first Legendre polynomial has been omitted in the expansion of  $u_r$ , as it would merely induce a constant shift of the object along the channel axis. The above ansatz yields a decoupled set of equations for each  $n$  that can easily be solved for  $\alpha_n^{\text{sh}}$  and  $\beta_n^{\text{sh}}$  ( $n \geq 2$ ), giving

$$\alpha_n^{\text{sh}} = \frac{\sigma_c r_0^2}{2Eh} \frac{(n(n+1) + \nu - 1)f_n + n(n+1)(1+\nu)g_n}{\frac{n(n+1)}{2} - 1} \quad (13a)$$

$$\beta_n^{\text{sh}} = \frac{\sigma_c r_0^2}{2Eh} \frac{(1+\nu)(f_n + 2g_n)}{\frac{n(n+1)}{2} - 1} \quad (13b)$$

and

$$\beta_1^{\text{sh}} = \frac{\sigma_c r_0^2}{2Eh} (1-\nu)f_1.$$

#### Elastic shell with surface tension

Here, we again consider the advected cell as a thin elastic shell and additionally allow for a surface tension, in analogy to active mechanical tension generated by motor proteins in the cell cortex (38). In the presence of hydrodynamic stress acting on the shell, the energy functional,  $E_{\text{sh}}$ , for a shell without surface tension needs to be complemented by the volume work due to the hydrostatic pressure excess,  $P$ , inside the shell and by a surface-tension term that penalizes the increase of the shell's surface area. In total, we have

$$E_{\text{tot}} = E_{\text{sh}} - P\Delta V + \gamma\Delta A. \quad (14)$$

Here,  $\Delta V$  and  $\Delta A$  denote the volume and surface area change, respectively (see Appendix C). For the undeformed, spherical shell of radius  $r_0$ , the surface tension,  $\gamma$ , is balanced by an internal hydrostatic pressure excess,  $P_0$ , which is given by the Laplace law,  $P_0 = 2\gamma/r_0$  (39). The symmetry properties of the flow field imply  $\Delta V = \mathcal{O}(u^2)$  (see Appendix C). As we consider only terms up to order  $\mathcal{O}(u^2)$  in the energy functional, we can set  $P = P_0$ . Deriving the Euler equations for the displacement fields from Eq. 14, it can be shown that only Eq. 10 is modified and now reads (40)

$$\begin{aligned} \frac{1}{r_0^2} \frac{Eh}{1-\nu} (2u_r + u'_\theta + u_\theta \cot \theta) - \sigma_{rr}^H \\ - \frac{\gamma}{r_0^2} (2u_r + u'_r \cot \theta + u''_r) = 0. \end{aligned} \quad (15)$$

The variation of the governing energy functional (Eq. 14) with respect to the tangential displacement,  $u_\theta$ , again results in Eq. 11. We can solve the system (Eqs. 11 and 15) again with the ansatz (Eq. 12). The final analytical solution for the full problem is given by

$$\alpha_{n,\gamma}^{\text{sh}} = \sigma_c r_0^2 \frac{(n(n+1) + \nu - 1)f_n + n(n+1)(1 + \nu)g_n}{[n(n+1) - 2][Eh + \gamma(n(n+1) + \nu - 1)]} \quad (16a)$$

$$\beta_{n,\gamma}^{\text{sh}} = \sigma_c r_0^2 \frac{(1 + \nu)(f_n + 2g_n) + \frac{\gamma}{Eh}(1 - \nu^2)[n(n+1) - 2]}{[n(n+1) - 2][Eh + \gamma(n(n+1) + \nu - 1)]}. \quad (16b)$$

By construction, Eq. 13, a and b, is just a special case of Eq. 16, a and b, i.e., we formally write  $\alpha_{n,\gamma=0}^{\text{sh}} = \alpha_n^{\text{sh}}$  and  $\beta_{n,\gamma=0}^{\text{sh}} = \beta_n^{\text{sh}}$ . For  $\gamma \gg Eh$ , this result implies  $\alpha_{n,\gamma}^{\text{sh}} \propto 1/\gamma$  and  $\beta_{n,\gamma}^{\text{sh}} \propto 1/Eh$ . Hence, in the case of large surface tension, normal displacements are highly suppressed, whereas tangential displacements are similar to those of a shell without surface tension.

## Deformed shapes

To quantify the magnitude of deformation for different sphere architectures, we use a previously introduced measure of deformation,  $d = 1 - c$  (17), where  $c$  is the circularity, defined as

$$c = 2\sqrt{\pi} \frac{\sqrt{A}}{P}.$$

In this expression,  $A$  is the area and  $P$  the perimeter of the (central) cross section of the deformed shapes. Note that  $d = 0$  for a circle and  $d > 0$  for any other shape. Hence, this measure describes the degree of deformation away from a circular cross section. Example solutions of deformed spheres at a fixed deformation,  $d$ , are depicted in Fig. 4, A and B. Comparing relative sphere sizes of  $\lambda = 0.7$  (top row) and  $\lambda = 0.9$  (bottom row), we find that increased relative sphere sizes lead to larger deformations. This observation reflects a commonly reported effect of enhanced confinement (22), which originates from an accompanying increase in hydrodynamic stress. For larger  $\lambda$ , there are regions of very high normal and tangential stress (see Fig. S3), resulting in shapes that show grooves and distinct bulges at  $\theta \approx \pi/2$  (Fig. 4 A, bottom row).

To quantify the differences between an elastic sphere and a thin elastic shell in more detail, we introduce a second deformation measure,  $\xi$ , defined as the fraction between minimal and maximal curvature of the shape boundary of a centered cross section  $\xi = \kappa_{\min}/\kappa_{\max}$ . Although deformation,  $d$ , quantifies the overall deviation from a spherical shape,  $\xi$  is more sensitive to local shape properties. In

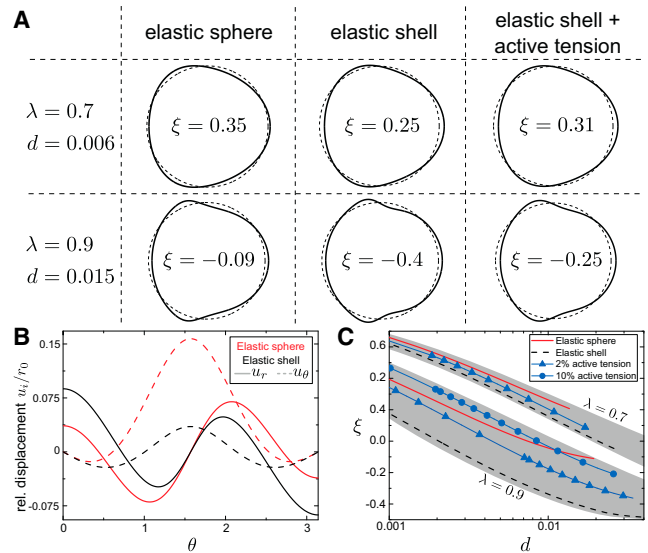

FIGURE 4 Deformations of an elastic sphere and a thin elastic shell with and without surface tension generated by the hydrodynamic loading in a cylindrical channel. (A) Representative example shapes for relative cell sizes  $\lambda = 0.7$  (top row) and  $\lambda = 0.9$  (bottom row). In each row, material parameters were chosen such that shapes have the same deformation,  $d$ . The curvature fraction,  $\xi$ , discriminates between the different models. (B) Displacement fields  $u_r(\theta)$  (solid lines) and  $u_\theta(\theta)$  (dashed lines) for the elastic sphere (red) and elastic shell (black) for  $\lambda = 0.7$ . Deformations of the elastic sphere are dominated by  $u_\theta$ , whereas deformations of the elastic shell are dominated by the radial displacement,  $u_r$ . (C) Interdependence of  $d$  and  $\xi$  for  $\lambda = 0.7$  (upper gray band) and  $\lambda = 0.9$  (lower gray band) for all three models under variation of material stiffness or flow rate, respectively. The solid lines with triangles correspond to  $\gamma = 0.02 \times Eh$  (right column in A), for which shapes occupy the intermediate shape space between elastic sphere and elastic shell without surface tension in each  $\lambda$  band. For an increased contribution of surface tension,  $\gamma = 0.1 \times Eh$  (solid line with circles), there can be a crossing with the elastic sphere model, i.e., regions where  $d$  and  $\xi$  can hardly discriminate between elastic sphere and elastic shell with surface tension. To see this figure in color, go online.

fact, the onset of the appearance of bulges and grooves in deformed shapes upon increasing relative cell size and/or flow rate is now simply encoded in a sign change of  $\xi$ .

In Fig. 4 C, we depict the behavior of  $d$  and  $\xi$  for  $\lambda = 0.7$  and  $\lambda = 0.9$ , varying the material stiffness or, equivalently, the flow rate,  $Q$ . We can identify distinct hyperplanes occupied by sphere and shell deformations in the shape space. Therefore, extracting shape measures  $d$  and  $\xi$  from experimental data at sufficiently high accuracy would allow discrimination between the cases of an elastic sphere and a thin shell.

Incorporating surface tension into our shell model results in a reduction of normal displacements. It is therefore possible to find combinations of surface tension,  $\gamma$ , and shell stiffness,  $Eh$ , that produce shapes and deformation measures very similar to those of an elastic sphere with a certain shear modulus,  $G$  (Fig. 4 C). This implies that in the linear deformation regime, contributions from a surface tension,  $\gamma$ , can disguise a thin elastic shell as an elastic sphere.

Using deformed shapes as presented in Fig. 4 A (top row), we estimated the change in hydrodynamic stress on the sphere's surface due to its deformation. To this end, we placed deformed shapes as rigid objects into a cylindrical channel and determined the hydrodynamic stress on their surface using finite-element simulations. We find that there is a small change of  $\sim 3.5\%$  on average across the surface, with peak values of 9%, which mainly result from a slight shift of stress peaks (see Section S8). Generally, we find average stress changes,  $\leq 10\%$ , for deformations of elastic spheres and elastic shells up to  $d \approx 0.02$ . To quantify the shape differences arising from these stress changes, we additionally performed fully coupled finite-element simulations of a solid elastic sphere that take the feedback between flow-field changes and elastic deformations into account (see Sections S8 and S12). We find good agreement between shapes generated by these fully coupled numerical simulations and shapes obtained from our analytical theory for deformations up to 0.02 (see Section S8). These numerical simulations confirm that the error in the stress on the sphere's surface is not critical within the deformation regime considered in this work.

### Testing the validity of our theory in square channels

To test the predictive power of our calculations for spheres advected in square channels, we analyzed the deformation of spherical agar beads measured in an RT-DC setup (see Materials and Methods). Beads were flushed through a square channel and imaged by brightfield microscopy focusing at the channel midheight. Agar beads were detected and their boundaries extracted (see Fig. 5, A and B) using our custom-built tracking software (17). The obtained two-dimensional shapes were fit to theoretically predicted shapes of a deformed elastic sphere advected in a cylindrical channel with equivalent channel radius assuming a Poisson ratio of 0.5. Fitting results point to an average bead stiffness of  $2.15 \pm 1.10$  kPa ( $N = 228$ , mean  $\pm$  SD). Stiffness variations originate here partly from bead inhomogeneities and partly from fitting errors, which are on average  $\sim 0.55$  kPa. Simultaneously, agar films (thickness  $\geq 1$  mm) were cast from the same agar preparation, whose stiffness was measured by AFM indentation (41) (see Section S9), giving an average elastic modulus of  $2.06 \pm 0.08$  kPa assuming  $\nu = 0.5$  ( $N = 48$ ). Comparing results for the stiffness of the agar used, we find on average very good quantitative agreement between agar films measured with AFM indentation and the analysis of deformed beads in the channel (Fig. 5 C).

### Measurement of cell stiffness

In addition, we measured cells of a human promyelocytic cell line (HL60) in an RT-DC setup and analyzed deformed

cell shapes just as in the case of the deformed agar beads described above (see Fig. 5, D–F). Employing the cell mechanical model of an isotropic elastic sphere and assuming incompressibility ( $\nu = 0.5$ ), we obtain on average an apparent cell elastic modulus of  $E = 1.48 \pm 0.51$  kPa ( $N = 281$ , mean  $\pm$  SD). The spread of the data may be accounted for by the fitting error of the elastic modulus (average value of 0.46 kPa) and by the biological variation of cells. Performing AFM indentation experiments, we find on average a Young's modulus of  $E = 170 \pm 85$  Pa ( $N = 169$ ). AFM force curves were analyzed using Hertz theory, making the comparable assumption of indentation into an incompressible, isotropic elastic material (42). The smaller stiffness value from AFM indentation experiments may be accounted for by the much shorter timescales ( $\approx 1$  ms) in RT-DC measurements (43). The error of the measured Young's modulus due to uncertainties in the Poisson ratio is discussed in Section S10.

Anticipating instead that the stiffness of HL60 cells is dominated by the cell boundary, i.e., the plasma membrane and cell cortex, it is more appropriate to perform cell-shape fitting using the model of a thin, incompressible elastic shell. Performing this analysis, the same sample yields an average cell-area expansion modulus of  $(Eh) = 23.7 \pm 8.4$  nN/ $\mu\text{m}$  (Fig. 5 F).

Finally, including a surface tension,  $\gamma$ , we find that area expansion moduli,  $(Eh)_\gamma$ , adopt reduced values as a result of the additional contribution of surface tension to the mechanical integrity of the cell. Setting  $\gamma$  to be 2% of the area expansion modulus, we find on average values that are approximately 20% smaller ( $(Eh)_\gamma = 19.2 \pm 6.8$  nN/ $\mu\text{m}$ ) than without additional surface tension. This value of  $(Eh)_\gamma$  corresponds to a surface tension of  $\gamma \approx 0.4$  nN/ $\mu\text{m}$ , which is in the range of experimentally measured cell-surface tensions (38,44).

### Analysis of RT-DC experiments

As a typical output of RT-DC measurements, cell deformation,  $d$ , is plotted versus cell size (imaged cell area), and in this representation, each cell population creates a cloud of data points (17). For further analysis, it is desirable to identify regions of similar cell stiffness in such scatterplots. In fact, cells with fixed elastic modulus but varying cell size create data points falling on a line in the deformation-versus-cell-area space. Using the equivalent channel radius together with the stream-function approach and the model of an elastic sphere or an elastic shell, we derived isoelasticity lines for a square channel with  $L = 20$   $\mu\text{m}$  (Fig. 6, A and B).

Isoelasticity lines are universal, i.e., they only need to be calculated once, and a subsequent change of experimental conditions only leads to a rescaling of elastic moduli. Beads and cells were measured at a flow rate of  $Q = 0.012$   $\mu\text{m}/\text{s}$  and the fluid viscosity was  $\eta = 15$  mPa $\cdot$ s, which yields



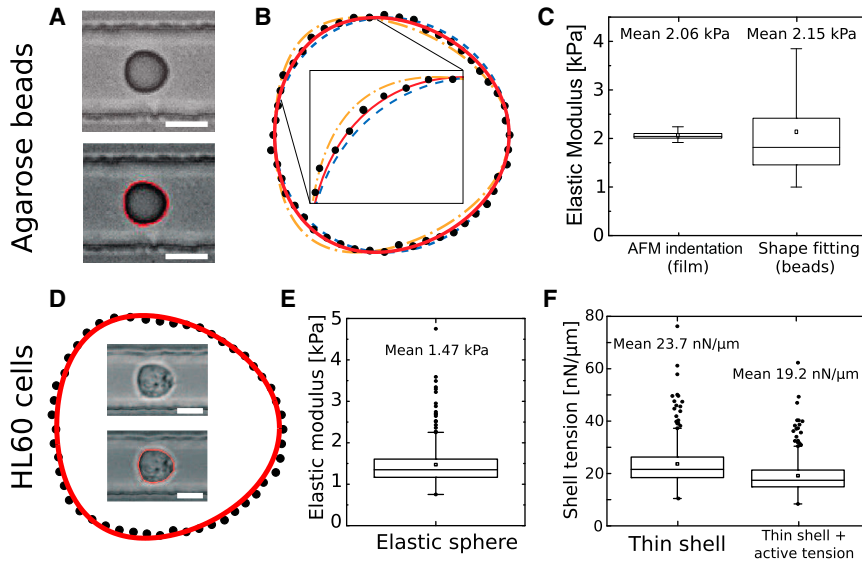

**FIGURE 5** Shape fitting of elastic agar beads and HL60 cells. (A) Deformed bead in the microfluidic channel (*top left*) overlaid with the contour found by the automatic contour detection (*bottom left*) (17). (B) Contour found by the tracking software (*dotted line*) overlaid by shapes from the theory for an elastic sphere for different elastic moduli,  $E = 1.05$  kPa (*yellow dash-dotted line*),  $E = 1.95$  kPa (*red solid line*, best fit, 95% confidence interval: 0.3 kPa) and  $E = 4.9$  kPa (*blue dashed line*). (C) Comparison of results from shape fitting of measured contours ( $N = 229$ ) with AFM indentation on agar film of the same composition as the beads ( $N = 48$  different spots indented). (D) Deformed cell in the microfluidic channel. In the outer contour, the cell boundary found by the tracking software is shown (*black dots*) overlaid by the shape of a solid elastic sphere of elastic modulus  $E = 1.6$  kPa according to our theory (*red solid line*). (E and F) Cell elastic moduli from shape fitting using the cell mechanical model of (E) a solid elastic sphere or (F) a thin elastic shell without (*left*) and with a relative surface tension of

$\gamma = 0.02 \times (Eh)$  (*right*). All measurements were taken with  $Q = 0.012 \mu\text{L/s}$ ,  $\eta = 15 \text{ mPa}\cdot\text{s}$ . In (C), (E), and (F), box plots show the mean value (*square*), first to third quartiles (*horizontal lines*), and  $1.5\times$  the interquartile region (*whiskers*). In (E) and (F), outliers are shown in addition (*black circles*). Scale bars in (A) and (D) are  $10 \mu\text{m}$ . To see this figure in color, go online.

$E_0 = 270 \text{ Pa}$  or, alternatively,  $(Eh)_0 \approx 3.4 \text{ nN}/\mu\text{m}$ . Changing to a different flow rate,  $Q'$ , viscosity,  $\eta'$ , and/or channel side length,  $L'$ , according to our characteristic stress scale simply leads to the conversion  $E'_0 = Q'\eta'L^3/(Q\eta L^3) \times E_0$  or  $(Eh)'_0 = Q'\eta'L^2/(Q\eta L^2) \times (Eh)_0$  and a rescaling of the labels written on the area axis by a factor of  $(L'/L)^2$ . Hence, isoelasticity lines provide a general look-up graphic that can easily be adapted to a given set of experimental parameters. Plotting them together with data points from RT-DC experiments allows identification of regions of similar cell stiffness (17).

Furthermore, we indicate in this look-up graphic the range of validity of our theory for RT-DC analysis by giving an estimate of the strain magnitude. To this end, we plotted curves where the magnitude of the maximal-strain eigenvalue averaged over the sphere surface adopts a certain

value (Fig. 6, A and B, *dashed lines*). Generally, the inaccuracy of our analytical approximation grows for larger strains and correspondingly for larger values of cell deformation. For the case of an elastic sphere, allowing for average strain values of up to 22% and thereby for errors on the order of  $\approx 5\%$ , the validity of our theory is limited to deformations of  $d \leq 0.02$  in the case of an elastic sphere (Fig. 6 A). For an elastic shell, strain values are smaller and the validity limit is set by the accuracy of the stress estimate on the shell's surface, which does not take into account changes in hydrodynamic surface stresses due to the deformation (see Section S8). Admitting average errors in stress up to 10%, our analysis is again limited to deformations of  $\leq 0.02$ .

To confirm this validity limit, we verified the predicted shapes of our analytic theory for the case of a solid elastic

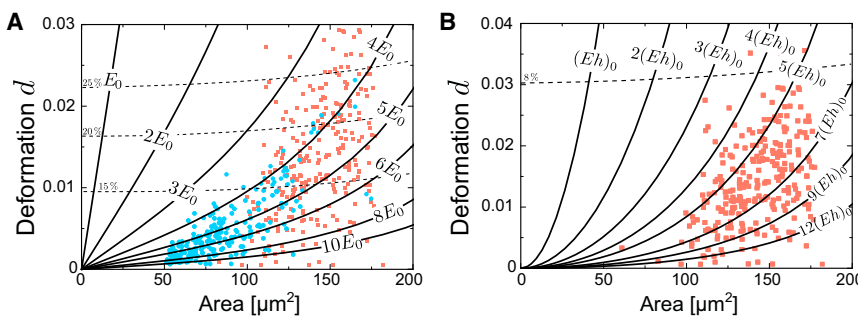

**FIGURE 6** Isoelasticity lines in the area-versus-deformation space for  $L = 20 \mu\text{m}$  with measurement data. This representation is universal, i.e., different experimental parameters simply correspond to different values of  $E_0$  and  $(Eh)_0$ . Thereby, it provides a general look-up graphic that can easily be adapted to changes in flow rate,  $Q$ , and suspension viscosity,  $\eta$ . The conversion rules between different experimental settings are explained in the text. Dashed lines indicate paths where the magnitude of the maximal eigenvalue of the strain tensor averaged over the sphere surface has a certain value (indicated). These lines represent an

indicator for the error of our analytical solution ( $\propto \epsilon^2$ ) and the limit of validity of the theory. (A) Isoelasticity lines of a solid elastic sphere with data points representing agarose bead measurements (*blue circles*) and HL60 cell measurements (*red squares*). For the applied experimental parameters,  $E_0 \approx 270 \text{ Pa}$ . (B) Isoelasticity lines of a thin elastic shell without surface tension with data points representing HL60 cell measurement (*red squares*). For the applied experimental parameters,  $(Eh)_0 \approx 3.4 \text{ nN}/\mu\text{m}$ . To see this figure in color, go online.

sphere by fully coupled finite-element simulations that take into account the coupling between flow field and elastic deformation (see Section S12). For deformations up to 0.02, we find good agreement between shapes generated with the numerical simulation and those produced by our analytical framework. Furthermore, a fit of our theory to simulated shapes reproduces the assumed Young's modulus within an accuracy of 4% at a deformation of 0.02 (see Fig. S6).

## DISCUSSION

We have presented a theoretical analysis that allows us to relate elastic parameters directly to the deformation of entire cells in RT-DC measurements on timescales of  $\approx 1$  ms. To do so, we calculated the deformation of an elastic spherical object advected by a steady Stokes flow in a cylindrical channel using linear elasticity theory. The concept of the equivalent channel radius allows us to map our analytical results onto the problem of a sphere in a square flow channel, as is typically used in RT-DC experiments. In RT-DC, suspended animal cells, which are initially close to spherical, are advected and deformed by a steady shear flow. Our study can be used to associate cell stiffness to cell deformation as obtained from RT-DC measurements, employing simple cell mechanical models. As our calculations rely on the approximations of linear elasticity theory, our analysis is restricted to the case of small cell deformations ( $d \lesssim 0.02$ ) with strains  $\gg 1$ .

The analytical study presented here enables us to calculate the flow field and stresses on the surface of the spherical object with minimal numerical effort ( $\leq 0.5$  s computation time on a standard personal computer) (Figs. 1, 2, and 3). Calculated surface stresses are directly proportional to the peak flow velocity,  $u$ , and can therefore be tuned continuously simply by changing the flow rate,  $Q$ .

We made the simplifying assumption of the cell being composed of an isotropic elastic material, motivated by the cell shape acquiring a steady state within the RT-DC microfluidic channel. The elastic deformation of the spherical object immersed in the flow depends on its architecture and its material properties. In detail, we considered the case of a solid elastic sphere and a thin elastic shell with or without surface tension (Fig. 4).

For the case of an elastic sphere and a thin elastic shell, surface displacement fields scale with  $\sigma_c/E$  ( $E \propto G$ ), where  $\sigma_c$  is the characteristic stress and  $E$  the Young's modulus of the material. This means, in particular, that any change in the elastic modulus, for example by a factor of  $f$ , can equivalently be interpreted as an according change in the flow rate by a factor of  $1/f$ . Furthermore, it highlights the need for a good experimental control of the flow rate to extract cell stiffness quantitatively. For the case of the shell, we find in addition that displacements are inversely proportional to shell thickness,  $h$ . Contributions from a surface ten-

sion,  $\gamma$ , reduce the radial displacement in a shell and can actually make a thin elastic shell look like an elastic sphere. To examine cells independently of surface tension during deformation experiments, cytoskeletal drugs such as blebbistatin (45) that inhibit myosin motor activity can be employed, which results in a strong reduction of cortical tension in cells (39,46).

We used two deformation measures, deformation,  $d$ , and curvature ratio,  $\xi$ , to characterize the dependence of sphere shape deformations on sphere architecture (Fig. 4, A and C). The discriminative power of the measures  $d$  and  $\xi$  with respect to sphere architecture increases the larger the deformation. Pinpointing inherent differences between the case of a solid elastic sphere and a thin elastic shell may help to determine experimentally whether elastic deformations on short timescales are dominated by elastic properties of the cell bulk or of the membrane-cortex entity at the cell boundary. A dominant cell bulk would correspond to the scenario of an elastic sphere, whereas a dominant cell boundary would be better captured by the model of an elastic shell. Although the deformation measure  $d$  has been regularly used in RT-DC experiments so far, a precise estimate of  $\xi$ , a new cell-shape measure (to our knowledge) suggested here, is not feasible with our current imaging techniques. A distinction between the two cell mechanical scenarios according to the interdependence between  $d$  and  $\xi$  (see Fig. 4 C) calls for an enhanced imaging technique together with cell-shape predictions at large cell deformations.

Our analytical results are validated by RT-DC measurements on agar beads with known stiffness, which were independently determined by AFM measurements of films of the same agar concentration. On average, the results are in very good agreement ( $E_{\text{RT-DC}} = 2.15 \pm 1.10$  kPa and  $E_{\text{AFM}} = 2.08 \pm 0.08$  kPa; see Fig. 5 C). First measurements on cells (HL60) point to elastic moduli of  $\approx 1.5$  kPa (Fig. 5 E). Quantification of whole-cell mechanical properties at such short timescales constitutes a largely uncharted territory, with a first relevant publication earlier this year (18). In fact, AFM indentation experiments of the same cell line yield considerably lower average elastic moduli of 0.17 kPa for HL60 cells. This discrepancy may be accounted for by the timescale dependence of cell stiffness. This effect is absent in simple materials such as agar (47). Frequency dependence of cell stiffness has been reported to scale typically with power laws of exponents 0.1 – 0.5 (43), even down to timescales of relevance here (18). In our AFM measurements, forces were applied on a timescale of  $\approx 1$  s (see Section S9). Using a power-law extrapolation to a timescale of 1 ms, which is a typical timescale of an RT-DC measurement, the mean stiffness value from the AFM measurements points to elastic moduli in the range  $\approx 0.34 - 5.4$  kPa, which is compatible with the value obtained from RT-DC ( $\approx 1.5$  kPa). An additional contribution to the discrepancy between elastic moduli from AFM and RT-DC measurements could be that the underlying model

of a homogeneous elastic sphere is not appropriate for an HL60 cell. If this is the case, a localized indentation as in AFM measurements and a bulk deformation as in flow cytometry may give rise to different effective elastic moduli.

Interpreting our RT-DC measurements in an alternative way, using a thin elastic shell as a cell mechanical model, HL60 cells exhibit an average cell-area expansion modulus of  $(Eh) = 23.7 \pm 8.4$  nN/ $\mu\text{m}$  (Fig. 5 F). Measurements on MDCK II cells performed by Pietuch et al. (48) point to comparable values of area expansion moduli in the range 10 – 100 nN/ $\mu\text{m}$ .

For interpretation of RT-DC data on cell populations, we have calculated a look-up graphic indicating regions of similar cell stiffness in graphs of cell deformation versus cell area (see Fig. 6). Therefore, our results facilitate the comparison between cell mechanical properties of cell populations with different average cell sizes, which is impossible by measurement of cell deformation alone. RT-DC, combined with our theoretical analysis, allows measurement of cell stiffnesses of large cell populations in a fast and efficient way and thereby opens up new possibilities for cell mechanical approaches in medical diagnostics and biology.

## APPENDIX A: SOLUTION OF THE FLOW FIELD IN TERMS OF A STREAM-FUNCTION APPROACH

The scalar stream function is defined by  $\Psi(\rho, z) = q(\rho, z)/2\pi$ , where  $q(\rho, z)$  is the volumetric flow rate across a circular disk of radius  $\rho$  centered around the  $z$  axis, placed at position  $z$  (33). It can easily be transformed to spherical coordinates by  $\rho = r\sin\theta$  and  $z = r\cos\theta$ . With this definition, Eqs. 1 and 2 lead to a single, fourth-order PDE (33),

$$\left[ \frac{\partial^2}{\partial r^2} + \left( \frac{\sin\theta}{r} \right)^2 \frac{\partial^2}{\partial (\cos\theta)^2} \right]^2 \Psi(r, \theta) = 0. \quad (17)$$

The operator in square brackets is separable (33) and the part of the solution that obeys the required symmetries in  $\theta$ ,  $\Psi(r, \theta) = \Psi(r, -\theta)$ , is given by

$$\Psi(r, \theta) = \sum_{\substack{n=2 \\ n \text{ even}}}^{\infty} \frac{P_{n-2}(\cos\theta) - P_n(\cos\theta)}{2n-1} \times (A_n r^n + B_n r^{-n+1} + C_n r^{n+2} + D_n r^{-n+3}), \quad (18)$$

with Legendre polynomials,  $P_n$ , and constants  $A_n$ ,  $B_n$ ,  $C_n$ , and  $D_n$  to be determined from the boundary conditions (Fig. 1 A). In the following, we sketch a procedure developed in Haberman and Sayre (30) to find the solution that obeys the boundary conditions depicted in Fig. 1. Detailed expressions can be found in the [Supporting Material](#).

## Calculating the stream-function expansion coefficients

Using Eqs. 3 and 18, the no-slip boundary condition on the surface of the sphere can be translated into two conditions on the set of constants

$(A_n, B_n, C_n, D_n)$ , which decouple for each  $n$  as a result of the orthogonality of the Legendre polynomials. To derive the conditions that follow from the boundary conditions on cylinder walls and channel inlet and outlet, a general solution,  $\tilde{\Psi}(\rho, z)$ , to Eq. 17 is additionally derived in cylindrical coordinates (30). By transforming the solution  $\Psi(r, \theta)$  into cylindrical coordinates,  $\Psi(r(\rho, z), \theta(\rho, z))$ , and comparing the coefficients of powers in  $\rho$  and  $z$  between  $\tilde{\Psi}(\rho, z)$  and  $\Psi(r(\rho, z), \theta(\rho, z))$ , a linear system of equations is derived that determines the constants  $(A_n, B_n, C_n, D_n)$  such that all boundary conditions are simultaneously satisfied ((30) and Section S2).

The resulting solution initially depends on the two dimensionless quantities  $\hat{u} = u/v$  and  $\lambda = r_0/R$ , where  $v$  is the equilibrium velocity of the sphere,  $u$  the peak velocity of the Poiseuille flow,  $r_0$  the sphere's radius, and  $R$  the channel radius. In general, the net force resulting from the hydrodynamic stresses acting on the sphere for an arbitrary choice of  $\hat{u}$  and  $\lambda$  will not vanish. However, we are only interested in a force-free steady-state motion of the sphere through the channel, which imposes the unique relation  $\hat{u}(\lambda)$  shown in Fig. 2 A. To find  $\hat{u}(\lambda)$ , we need to derive the corresponding constraint that force-free motion imposes on  $(A_n, B_n, C_n, D_n)$ . Using Eqs. 3, 4, and 18, it can be shown that the expansion coefficients of the hydrodynamic stress (Eq. 5, a and b) read (30)

$$f_n = \frac{2}{v} \left( \frac{2n+3}{n} r_0^{n+1} C_{n+1} + \frac{2n-1}{n+1} r_0^{-n} D_{n+1} \right) \quad (19a)$$

$$g_n = -\frac{1}{v} \left( \frac{n-1}{n} r_0^{n-1} A_{n+1} + \frac{n+2}{n+1} r_0^{-n-2} B_{n+1} + \frac{n+3}{n} r_0^{n+1} C_{n+1} + \frac{n-2}{n+1} r_0^{-n} D_{n+1} \right). \quad (19b)$$

Additionally, integrating the general expansion of the surface stress (Eq. 5, a and b) over the surface of the sphere and requiring the result to vanish leads to the constraint relation  $f_1 + 2g_1 = 0$ . This constraint relation, together with Eq. 19, a and b, can be used to derive a condition on  $(A_n, B_n, C_n, D_n)$ , such that the resulting solution,  $\Psi(r, \theta)$  corresponds to a force-free motion of the sphere through the channel. Details of the solution procedure are given in Section S2.

## APPENDIX B: SOLID ELASTIC SPHERE

If we use the displacement as given in Eq. 8 to calculate the nonvanishing components of  $\sigma$  as given in Eq. 7, we find

$$\sigma_{rr}(r, \theta) = 2G \sum_{n=1}^{\infty} (a_n(n+1)(n^2 - n - 2 - 2\nu)r^n + b_n n(n-1)r^{n-2}) P_n(\cos\theta) \quad (20a)$$

$$\sigma_{r\theta}(r, \theta) = 2G \sum_{n=1}^{\infty} (a_n(n^2 + 2n - 1 + 2\nu)r^n + b_n(n-1)r^{n-2}) \frac{dP_n(\cos\theta)}{d\theta}. \quad (20b)$$

By comparing the elastic stress components (Eq. 20) at  $r = r_0$  with the hydrodynamic stress on the surface of the sphere given in Eq. 5, we find, for  $n \geq 2$ ,

$$a_n = \frac{\sigma_c}{2Gr_0^n} \frac{ng_n - f_n}{n^2 + n + 1 + 2n\nu + \nu} \quad (21a)$$

$$b_n = \frac{\sigma_c}{2Gr_0^{n-2}} \frac{(2+3n-n^3+2nv+2v)f_n + (n^2+2n-1+2v)g_n}{(n-1)(n^2+n+1+2nv+v)}. \quad (21b)$$

The constant  $b_1$  introduces merely a constant shift of the sphere in the direction of the channel axis and does not contribute to the stress. Therefore, we set  $b_1 = 0$ . Using the constraint  $f_1 + 2g_1 = 0$  of zero net force, we find consistently for  $a_1$

$$a_1 = -\frac{\sigma_c}{Gr_0} \frac{f_1}{4(1+\nu)}. \quad (22)$$

Now, we expand the displacement field of a solid elastic sphere on the sphere's surface in terms of

$$u_r|_{r=r_0} = \sum_{n=1}^{\infty} \alpha_n^{\text{sp}} P_n(\cos \theta) \quad (23)$$

$$u_\theta|_{r=r_0} = \sum_{n=1}^{\infty} \beta_n^{\text{sp}} \frac{dP_n(\cos \theta)}{d\theta}. \quad (24)$$

Using the derived expressions for  $a_n$  and  $b_n$ ,  $\alpha_n^{\text{sp}}$  and  $\beta_n^{\text{sp}}$  can be calculated as

$$\alpha_n^{\text{sp}} = \frac{\sigma_c r_0}{2G} \frac{(f_n(2\nu - 2(\nu - 1)n^2 + \nu n - 1) + g_n n(n+1)((2\nu - 1)n - \nu + 2))}{(n-1)(\nu + n^2 + 2\nu n + n + 1)} \quad (25a)$$

$$\beta_n^{\text{sp}} = \frac{\sigma_c r_0}{2G} \frac{(f_n(-\nu + (2\nu - 1)n + 2) + g_n(\nu - 2(\nu - 1)n^2 + (3\nu - 1)n + 1))}{(n-1)(\nu + n^2 + 2\nu n + n + 1)}. \quad (25b)$$

## APPENDIX C: THIN SHELL WITH SURFACE TENSION

For a rotationally symmetric shape whose boundary is described by  $\mathbf{r}(\theta, \phi) = [r_0 + u_r(\theta)]\mathbf{e}_r + u_\theta(\theta)\mathbf{e}_\theta$ , surface area  $A^{(d)}$ , and enclosed volume  $V^{(d)}$  of the deformed shape, read

$$\begin{aligned} A^{(d)} &= 2\pi \int_0^\pi \left| \frac{\partial \mathbf{r}}{\partial \theta} \right| \left| \frac{\partial \mathbf{r}}{\partial \phi} \right| d\theta \\ &= 4\pi r_0^2 + 2\pi \int_0^\pi \left[ r_0(2u_r + u_\theta \cot \theta + u'_\theta) + (u_r + u'_\theta) \right. \\ &\quad \left. \times (u_r + u_\theta \cot \theta) + \frac{(u'_r - u_\theta)^2}{2} \right] \sin \theta d\theta + \mathcal{O}(u^3) \\ &= A_0 + \Delta A(\mathbf{u}) + \mathcal{O}(u^3) \end{aligned} \quad (26)$$

$$\begin{aligned} V^{(d)} &= \pi \int_0^\pi (r_0 - u'_r \cot \theta + u_r + u'_\theta \\ &\quad + u_\theta \cot \theta) ((r_0 + u_r) \sin \theta + u_\theta \cos \theta)^2 \sin \theta d\theta \end{aligned}$$

$$\begin{aligned} &= \frac{4}{3} \pi r_0^3 + \left[ \pi \int_0^\pi (r_0 - u'_r \cot \theta + u_r + u'_\theta + u_\theta \cot \theta) \right. \\ &\quad \left. \times ((r_0 + u_r) \sin \theta + u_\theta \cos \theta)^2 \sin \theta d\theta - \frac{4}{3} \pi r_0^3 \right] \\ &= V_0 + \Delta V(\mathbf{u}), \end{aligned} \quad (27)$$

where  $A_0$  and  $V_0$  are the surface area and volume of the undeformed sphere. By the symmetry of the problem, one has  $\Delta V = \mathcal{O}(u^2)$ . To see this, assume a displacement solution,  $\mathbf{u}$ , is given for a flow field in the  $z$  direction. Changing the direction of the flow from  $z$  to  $-z$ , leaving all other parameters unchanged, will produce the same displacement field, but with a change in sign from  $\mathbf{u}$  to  $-\mathbf{u}$ . For a linear contribution to the volume change,  $\delta V \propto u_i$ , this would imply  $\delta V \rightarrow -\delta V$ . However, the value of the volume cannot depend on the direction of the flow. Therefore,  $\Delta V(\mathbf{u}) = \mathcal{O}(u^2)$ . This also follows explicitly from Eq. 27. using the facts that  $u_r(-\theta) = -u_r(\theta)$  and  $u_\theta(-\theta) = u_\theta(\theta)$ . Because we only consider an energy functional up to  $\mathcal{O}(u^2)$ ,  $P$  is given by the constant Laplace pressure,  $P_0 = 2\gamma/r_0$ . Using Eqs. 14, 26, and 27, we find to linear order in  $u_i$

$$\begin{aligned} \frac{\delta E}{\delta u_r} &= \frac{\delta E_{sh}}{\delta u_r} - r_0 \left( \left( P - \frac{2\gamma}{r_0} \right) (r_0 + u'_\theta + u_\theta \cot \theta) \right. \\ &\quad \left. + 2 \left( P - \frac{\gamma}{r_0} \right) u_r + \frac{\gamma}{r_0} (u'_r \cot \theta + u''_r) \right) \sin \theta \end{aligned}$$

$$\frac{\delta E}{\delta u_\theta} = \frac{\delta E_{sh}}{\delta u_\theta} - r_0 \left( P - \frac{2\gamma}{r_0} \right) (u_\theta - u'_r) \sin \theta. \quad (28)$$

Plugging in the Laplace pressure,  $P = P_0 = 2\gamma/r_0$ , yields the Euler equations as given in the main text (Eqs. 10 and 14).

## SUPPORTING MATERIAL

Supporting Materials and Methods, seven figures, and two tables are available at [http://www.biophysj.org/biophysj/supplemental/S0006-3495\(15\)00939-X](http://www.biophysj.org/biophysj/supplemental/S0006-3495(15)00939-X).

## AUTHOR CONTRIBUTIONS

A.M., O.O., and E.F.F. developed the theoretical analysis. A.M., O.O., S.G., P.R., A.T., and E.U. performed the experiments, S.A. performed numerical simulations, and A.M., O.O., P.R., A.T., and E.U. analyzed the



data. A.M., O.O., J.G., and E.F.F. designed the research and wrote the main manuscript.

## ACKNOWLEDGMENTS

We thank Benjamin Friedrich for advice on hydrodynamical problems and Christoph Herold, Daniel Klaue, and Angelika Jakobi for fruitful discussions on the subject. In addition, we thank Axel Voigt for the idea of using an Oldroyd-B phase-field model in the numerical simulations. O.O., P.R., and J.G. are named inventors on a patent application by the Technische Universität Dresden that covers RT-DC.

This work was funded by the Alexander von Humboldt Stiftung (Humboldt professorship to J.G.), the Sächsische Ministerium für Wissenschaft und Kunst (TG70 grant to O.O. and J.G.), the Max Planck Society, the Deutsche Forschungsgemeinschaft (SPP1506 grant to S.A.), and by the European Union's Seventh Framework Programme under grant agreement no. 632222 (Proof-Of-Concept Grant FastTouch to J.G.). Computations were carried out at Zentrum für Informationsdienste und Hochleistungsrechnen Dresden and Forschungszentrum Jülich.

## REFERENCES

- Ekpenyong, A. E., G. Whyte, ..., J. Guck. 2012. Viscoelastic properties of differentiating blood cells are fate- and function-dependent. *PLoS One*. 7:e45237.
- Lautenschläger, F., S. Paschke, ..., J. Guck. 2009. The regulatory role of cell mechanics for migration of differentiating myeloid cells. *Proc. Natl. Acad. Sci. USA*. 106:15696–15701.
- Tse, H. T. K., D. R. Gossett, ..., D. D. Carlo. 2013. Quantitative diagnosis of malignant pleural effusions by single-cell mechanophenotyping. *Sci. Transl. Med.* 5:212ra163.
- Tee, S.-Y., J. Fu, ..., P. A. Janmey. 2011. Cell shape and substrate rigidity both regulate cell stiffness. *Biophys. J.* 100:L25–L27.
- Suresh, S. 2007. Biomechanics and biophysics of cancer cells. *Acta Biomater.* 3:413–438.
- Lincoln, B., H. M. Erickson, ..., J. Guck. 2004. Deformability-based flow cytometry. *Cytometry A*. 59:203–209.
- Guck, J., S. Schinkinger, ..., C. Bilby. 2005. Optical deformability as an inherent cell marker for testing malignant transformation and metastatic competence. *Biophys. J.* 88:3689–3698.
- Remmerbach, T. W., F. Wottawah, ..., J. Guck. 2009. Oral cancer diagnosis by mechanical phenotyping. *Cancer Res.* 69:1728–1732.
- Hur, S. C., H. T. K. Tse, and D. Di Carlo. 2010. Sheathless inertial cell ordering for extreme throughput flow cytometry. *Lab Chip*. 10: 274–280.
- Pfafferoth, C., G. B. Nash, and H. J. Meiselman. 1985. Red blood cell deformation in shear flow. Effects of internal and external phase viscosity and of in vivo aging. *Biophys. J.* 47:695–704.
- Swaminathan, V., K. Myhre, ..., R. Superfine. 2011. Mechanical stiffness grades metastatic potential in patient tumor cells and in cancer cell lines. *Cancer Res.* 71:5075–5080.
- Wang, G., W. Mao, ..., T. Sulchek. 2013. Stiffness dependent separation of cells in a microfluidic device. *PLoS One*. 8:e75901.
- Gossett, D. R., H. T. K. Tse, ..., D. Di Carlo. 2012. Hydrodynamic stretching of single cells for large population mechanical phenotyping. *Proc. Natl. Acad. Sci. USA*. 109:7630–7635.
- Xu, W., R. Mezencev, ..., T. Sulchek. 2012. Cell stiffness is a biomarker of the metastatic potential of ovarian cancer cells. *PLoS One*. 7:e46609.
- Pullarkat, P. A., P. A. Fernández, and A. Ott. 2007. Rheological properties of the Eukaryotic cell cytoskeleton. *Phys. Rep.* 449: 29–53.
- Byun, S., S. Son, ..., S. R. Manalis. 2013. Characterizing deformability and surface friction of cancer cells. *Proc. Natl. Acad. Sci. USA*. 110:7580–7585.
- Otto, O., P. Rosendahl, ..., J. Guck. 2015. Real-time deformability cytometry: on-the-fly cell mechanical phenotyping. *Nat. Methods*. 12:199–202, 4, 202 (advance online publication).
- Lange, J. R., J. Steinwachs, ..., B. Fabry. 2015. Microconstriction arrays for high-throughput quantitative measurements of cell mechanical properties. *Biophys. J.* 109:26–34.
- Fedosov, D. A., H. Noguchi, and G. Gompper. 2014. Multiscale modeling of blood flow: from single cells to blood rheology. *Biomech. Model. Mechanobiol.* 13:239–258.
- Abreu, D., M. Levant, ..., U. Seifert. 2014. Fluid vesicles in flow. *Adv. Colloid Interface Sci.* 208:129–141.
- Fedosov, D. A., M. Peltomäki, and G. Gompper. 2014. Deformation and dynamics of red blood cells in flow through cylindrical microchannels. *Soft Matter*. 10:4258–4267.
- Couplier, G., A. Farutin, ..., C. Misbah. 2012. Shape diagram of vesicles in Poiseuille flow. *Phys. Rev. Lett.* 108:178106.
- Noguchi, H., and G. Gompper. 2005. Shape transitions of fluid vesicles and red blood cells in capillary flows. *Proc. Natl. Acad. Sci. USA*. 102:14159–14164.
- Pozrikidis, C. 2005. Numerical simulation of cell motion in tube flow. *Ann. Biomed. Eng.* 33:165–178.
- Hu, X.-Q., A.-V. Salsac, and D. Barthès-Biesel. 2012. Flow of a spherical capsule in a pore with circular or square cross-section. *J. Fluid Mech.* 705:176–194.
- Kuriakose, S., and P. Dimitrakopoulos. 2011. Motion of an elastic capsule in a square microfluidic channel. *Phys. Rev. E Stat. Nonlin. Soft Matter Phys.* 84:011906.
- Barthès-Biesel, D. 1980. Motion of a spherical microcapsule freely suspended in a linear shear flow. *J. Fluid Mech.* 100:831–853.
- Lighthill, M. J. 1968. Pressure-forcing of tightly fitting pellets along fluid-filled elastic tubes. *J. Fluid Mech.* 34:113–143.
- Fitz-Gerald, J. M. 1969. Mechanics of red-cell motion through very narrow capillaries. *Proc. R. Soc. Lond. B Biol. Sci.* 174:193–227.
- Haberman, L., and R. Sayre. 1958. Motion of Rigid and Fluid Spheres in Stationary and Moving Liquids inside Cylindrical Tubes (David W. Taylor Model Basin. Report). David Taylor, editor. Department of the Navy, Bethesda, MD.
- Bruus, H. 2008. Theoretical Microfluidics. Oxford University Press, Oxford, United Kingdom.
- Huebscher, R. 1948. Friction equivalents for round, square and rectangular ducts. *ASHVE Transactions*. 54:101–118.
- Happel, J., and H. Brenner. 1973. Low Reynolds Number Hydrodynamics. Nordhoff International, Chatsworth, CA.
- Landau, L., and E. Lifshitz. 1986. Theory of Elasticity. Elsevier, Amsterdam.
- Lurie, A. I. 2005. Theory of Elasticity. Springer, New York.
- Ananthakrishnan, R., J. Guck, ..., J. Käs. 2006. Quantifying the contribution of actin networks to the elastic strength of fibroblasts. *J. Theor. Biol.* 242:502–516.
- Ugural, A. 1999. Stresses in Plates and Shells. McGraw-Hill, New York.
- Salbreux, G., G. Charras, and E. Paluch. 2012. Actin cortex mechanics and cellular morphogenesis. *Trends Cell Biol.* 22:536–545.
- Fischer-Friedrich, E., A. A. Hyman, ..., J. Helenius. 2014. Quantification of surface tension and internal pressure generated by single mitotic cells. *Sci. Rep.* 4:6213.
- Berthoumieux, H., J.-L. Maître, ..., G. Salbreux. 2014. Active elastic thin shell theory for cellular deformations. *New J. Phys.* 16:065005.

41. Domke, J., and M. Radmacher. 1998. Measuring the elastic properties of thin polymer films with the atomic force microscope. *Langmuir*. 14:3320–3325.
42. Radmacher, M., M. Fritz, ..., P. K. Hansma. 1996. Measuring the viscoelastic properties of human platelets with the atomic force microscope. *Biophys. J.* 70:556–567.
43. Kollmannsberger, P., and B. Fabry. 2011. Linear and nonlinear rheology of living cells. *Annu. Rev. Mater. Res.* 41:75–97.
44. Rosenbluth, M. J., W. A. Lam, and D. A. Fletcher. 2006. Force microscopy of nonadherent cells: a comparison of leukemia cell deformability. *Biophys. J.* 90:2994–3003.
45. Straight, A. F., A. Cheung, ..., T. J. Mitchison. 2003. Dissecting temporal and spatial control of cytokinesis with a myosin II Inhibitor. *Science*. 299:1743–1747.
46. Tinevez, J.-Y., U. Schulze, ..., E. Paluch. 2009. Role of cortical tension in bleb growth. *Proc. Natl. Acad. Sci. USA*. 106:18581–18586.
47. Nayar, V. T., J. D. Weiland, ..., A. M. Hodge. 2012. Elastic and viscoelastic characterization of agar. *J. Mech. Behav. Biomed. Mater.* 7: 60–68.
48. Pietuch, A., B. R. Brückner, ..., A. Janshoff. 2013. Elastic properties of cells in the context of confluent cell monolayers: impact of tension and surface area regulation. *Soft Matter*. 9:11490–11502.

# Supporting Material

## Extracting cell stiffness from Real-Time Deformability Cytometry

— a theoretical and experimental analysis

A. Mietke<sup>1</sup>, O. Otto<sup>1</sup>, S. Girardo<sup>1</sup>, P. Rosendahl<sup>1</sup>, A. Taubenberger<sup>1</sup>,  
E. Ulbricht<sup>1</sup>, S. Golfier<sup>1</sup>, S. Aland<sup>2</sup>, J. Guck<sup>1</sup>, and E. Fischer-Friedrich<sup>3,4,\*</sup>

<sup>1</sup> *Biotechnology Center, Technische Universität Dresden, Dresden, Germany*

<sup>2</sup> *Institute of Scientific Computing, Technische Universität Dresden, Dresden, Germany*

<sup>3</sup> *Max Planck Institute for the Physics of Complex Systems, Dresden, Germany and*

<sup>4</sup> *Max Planck Institute of Molecular Cell Biology and Genetics, Dresden, Germany*

## S1. PERTURBATION APPROACH FOR THE CALCULATION OF THE ELASTIC DEFORMATION OF AN ADVECTED SPHERE

We estimate surface stress and elastic strain of an advected, elastic sphere in terms of a perturbation approach that is valid for small flow rates  $Q$ . To make this more precise, we introduce a dimensionless flow rate  $\hat{Q} = \frac{\eta Q}{ER^3}$ . Here,  $\eta$  is the viscosity of the carrier medium,  $R$  is the channel radius and  $E$  is the sphere's Young's modulus. Our perturbation calculation takes into account terms up to first order in  $\hat{Q}$ . The hydrodynamic stress  $\boldsymbol{\sigma}^H$  on the sphere's surface is a function of  $\hat{Q}$  and of the elastic deformation of the sphere captured by the strain tensor  $\boldsymbol{\epsilon}$ . Accordingly, we make an expansion

$$\sigma_{ij}^H(\hat{Q}, \boldsymbol{\epsilon}) = A_0(\boldsymbol{\epsilon}) + A_1(\boldsymbol{\epsilon})\hat{Q} + \mathcal{O}(\hat{Q}^2)$$

As hydrodynamic stresses vanish if the flow rate is zero,  $A_0(\boldsymbol{\epsilon})$  equals zero. Further,  $\boldsymbol{\epsilon}$  is also a function of  $\hat{Q}$  with

$$\boldsymbol{\epsilon}(\hat{Q}) = \mathcal{O}(\hat{Q}).$$

Accordingly

$$A_1(\boldsymbol{\epsilon}) = A_{1,0} + \mathcal{O}(\boldsymbol{\epsilon}) = A_{1,0} + \mathcal{O}(\hat{Q}).$$

Therefore,

$$\sigma_{ij}^H(\hat{Q}, \boldsymbol{\epsilon}(\hat{Q})) = A_{1,0}\hat{Q} + \mathcal{O}(\hat{Q}^2).$$

We conclude, that for a perturbation approach up to first order in  $\hat{Q}$ , we may estimate the stress on the sphere's surface using an undeformed sphere ( $\boldsymbol{\epsilon} = 0$ ).

Although less intuitive,  $\hat{Q}$  may also be regarded as a function of  $\boldsymbol{\epsilon}$  with

$$\hat{Q}(\boldsymbol{\epsilon}) = \mathcal{O}(\boldsymbol{\epsilon}).$$

Therefore, a first order perturbation calculation in  $\hat{Q}$  is equivalent to a first order perturbation calculation in elastic strain  $\boldsymbol{\epsilon}$  which is a common approach in elasticity theory.

## S2. CALCULATION OF THE STRESS ACTING ON THE SURFACE OF AN ADVECTED SPHERE

In the following, we explain in detail how to determine the expansion coefficients ( $A_n, B_n, C_n, D_n$ ) of the stream function  $\Psi$  introduced in Eq. (18) (main text).



Characteristic scales and dimensional reduction. To simplify the notation and to find the minimal set of independent parameters, we define the characteristic scales composed of the radius of the sphere  $r_0$ , the velocity of the sphere  $v$  in the rest frame of the channel, and the fluid viscosity  $\eta$ . With this, we find a characteristic force  $F_c \equiv r_0 \eta v$  and a characteristic stress  $\sigma_c \equiv \frac{\eta v}{r_0}$ . The latter can be used to define a dimensionless elastic modulus by  $\hat{E} \equiv E/\sigma_c$ , a dimensionless shear modulus by  $\hat{G} \equiv G/\sigma_c$ , as well as a dimensionless pressure by  $\hat{p} \equiv p/\sigma_c$ . Further, we introduce a dimensionless stream function  $\hat{\Psi}$  given by  $\hat{\Psi} \equiv \Psi/(vr_0^2)$ . Accordingly, we define dimensionless expansion coefficients  $(\hat{A}_n, \hat{B}_n, \hat{C}_n, \hat{D}_n)$  that relate to Eq. (18) (main text) by  $A_n \equiv vr_0^{2-n} \hat{A}_n$ ,  $B_n \equiv vr_0^{n+1} \hat{B}_n$ ,  $C_n \equiv vr_0^{-n} \hat{C}_n$  and  $D_n \equiv vr_0^{n-1} \hat{D}_n$ . In addition, we introduce the notation  $\hat{\mathbf{A}}_n := (\hat{A}_n, \hat{B}_n, \hat{C}_n, \hat{D}_n)$ , so that  $\{\hat{\mathbf{A}}_n\}$  denotes the set of all dimensionless expansion coefficients.

**Calculating the constants  $(\hat{A}_n, \hat{B}_n, \hat{C}_n, \hat{D}_n)$  for a force-free motion of the sphere through the channel.** The linear system of equations that is found by the procedure outlined in Appendix A of the main text reads [2]

$$\begin{aligned}
\hat{u} + \sum_{\substack{n=0 \\ n \text{ even}}}^{\infty} (\mathcal{A}_n^{(\alpha_0)} a_n + \mathcal{B}_n^{(\alpha_0)} b_n) &= -1 & \sum_{\substack{n=0 \\ n \text{ even}}}^{\infty} (\mathcal{A}_n^{(\beta_0)} a_n + \mathcal{B}_n^{(\beta_0)} b_n) &= -\frac{2}{5} \lambda^2 \\
\sum_{\substack{n=0 \\ n \text{ even}}}^{\infty} (\mathcal{A}_n^{(\alpha_1)} a_n + \mathcal{B}_n^{(\alpha_1)} b_n) &= \frac{2}{5} \lambda^2 & \sum_{\substack{n=0 \\ n \text{ even}}}^{\infty} (\mathcal{A}_n^{(\beta_1)} a_n + \mathcal{B}_n^{(\beta_1)} b_n) &= 0 \\
\sum_{\substack{n=0 \\ n \text{ even}}}^{\infty} (\mathcal{A}_n^{(\alpha_2)} a_n + \mathcal{B}_n^{(\alpha_2)} b_n) &= 0 & \sum_{\substack{n=0 \\ n \text{ even}}}^{\infty} (\mathcal{A}_n^{(\beta_2)} a_n + \mathcal{B}_n^{(\beta_2)} b_n) &= 0 \\
& \vdots & & \\
\sum_{\substack{n=0 \\ n \text{ even}}}^{\infty} (\mathcal{A}_n^{(\alpha_k)} a_n + \mathcal{B}_n^{(\alpha_k)} b_n) &= 0 & \sum_{\substack{n=0 \\ n \text{ even}}}^{\infty} (\mathcal{A}_n^{(\beta_k)} a_n + \mathcal{B}_n^{(\beta_k)} b_n) &= 0 \\
& \vdots & &
\end{aligned} \tag{S1}$$

with

$$\begin{aligned}
\mathcal{A}_n^{(\alpha_k)} &= \delta_{2k,n} \frac{(4k+5)(2k+2)!}{4} \pi + \left( \frac{I_1^{(2k+n+1)}}{(2k-2)!(4k+1)} - \frac{I_2^{(2k+n+2)}}{(2k)!} \right) \lambda^{n+2k+3} \\
\mathcal{A}_n^{(\beta_k)} &= \delta_{2k,n} \frac{(4k+3)(2k+2)!}{4} \pi - \frac{I_1^{(2k+n)}}{(2k)!(4k+5)} \lambda^{n+2k+5} \\
\mathcal{B}_n^{(\alpha_k)} &= \left( \delta_{2k,n} \frac{(4k+3)(2k+2)!}{4(4k+1)} + \delta_{2k,n-2} \frac{(2k+2)(2k+1)(2k+2)!}{4} \right) \pi \\
&\quad + \left( \frac{I_3^{(2k+n+1)}}{(2k)!} + \frac{(2k+2)(2k+1)}{(2k)!(4k+1)} I_2^{(2k+n)} \right) \lambda^{n+2k+1} \\
\mathcal{B}_n^{(\beta_k)} &= \left( \delta_{2k,n} \frac{(2k+2)!}{4} + \delta_{2k,n-2} \frac{(2k+2)(4k+3)(2k+1)(2k+2)!}{4(4k+5)} \right) \pi \\
&\quad - \frac{I_2^{(2k+n-1)}}{(2k)!(4k+5)} \lambda^{n+2k+3},
\end{aligned}$$

where  $I_1^{(s)}, I_2^{(s)}, I_3^{(s)}$  are integrals that are given explicitly in [2] (p. 17 therein) and that need to be evaluated numerically.  $\delta_{i,j}$  is the usual Kronecker symbol. In Eq. (S1), we have introduced the dimensionless quantities  $\lambda = r_0/R$  with the radius of the advected sphere  $r_0$  and the channel radius  $R$ , as well as  $\hat{u} = u/v$  with the velocity of the sphere  $v$  and the maximum flow velocity  $u$  of the Poiseuille flow at infinity. The above system of equations (S1) is solved in terms of  $(a_0, a_2, \dots, b_0, b_2, \dots)$ .

The expansion coefficients  $(\hat{A}_n, \hat{B}_n, \hat{C}_n, \hat{D}_n)$  can then be obtained from [2]

$$\hat{B}_n = (-1)^{\frac{n}{2}+1} \pi \left( \frac{n!}{2} a_{n-2} + \frac{n(n-1)n!}{2(2n+1)} b_n \right) \quad (\text{S2a})$$

$$\hat{D}_n = (-1)^{\frac{n}{2}+1} \frac{\pi n!}{2(2n-3)} b_{n-2} \quad (\text{S2b})$$

$$\hat{A}_n = -\frac{2n+1}{2} \hat{B}_n + \frac{1-2n}{2} \hat{D}_n \quad (\text{S2c})$$

$$\hat{C}_n = \frac{2n-1}{2} \hat{B}_n + \frac{2n-3}{2} \hat{D}_n. \quad (\text{S2d})$$

An additional constraint on the system of equations (S1) emerges from the condition of a force free steady-state motion of the sphere. As an expansion of the stress of the surface of

the sphere, we introduced in the main text

$$\begin{aligned}\sigma_{rr}^H|_{r=r_0} &= \sigma_c \sum_{\substack{n=1 \\ n \text{ odd}}}^{\infty} f_n P_n(\cos \theta) \\ \sigma_{r\theta}^H|_{r=r_0} &= \sigma_c \sum_{\substack{n=1 \\ n \text{ odd}}}^{\infty} g_n \frac{dP_n(\cos \theta)}{d\theta},\end{aligned}$$

with

$$f_n(\hat{\mathbf{A}}_{n+1}) = 2 \left( \frac{2n+3}{n} \hat{C}_{n+1} + \frac{2n-1}{n+1} \hat{D}_{n+1} \right) \quad (\text{S3a})$$

$$g_n(\hat{\mathbf{A}}_{n+1}) = - \left( \frac{n-1}{n} \hat{A}_{n+1} + \frac{n+2}{n+1} \hat{B}_{n+1} + \frac{n+3}{n} \hat{C}_{n+1} + \frac{n-2}{n+1} \hat{D}_{n+1} \right). \quad (\text{S3b})$$

Integrating the general expansion of surface stress over the surface of the sphere and imposing a vanishing net force leads to the constraint relation  $f_1 + 2g_1 \stackrel{!}{=} 0$ . Plugging Eqns. (S3a) and (S3b) into this relation and using  $2\hat{C}_2 - 3\hat{B}_2 = 0$  (this can be seen by evaluating  $v_r(r_0) = 0$  and  $v_\theta(r_0) = 0$ ) it follows that  $\hat{D}_2 \stackrel{!}{=} 0$ . It can be seen from Eq. (S2b) that this is equivalent to  $b_0 = 0$ . Hence, for a given  $\lambda$ , we simply solve Eqns. (S1) by setting  $b_0 = 0$  and treating  $\hat{u} = u/v$  as an additional unknown instead, whose value depend on the particular choice of  $\lambda$ .

The described method provides a fast and numerically exact method to simultaneously determine  $\hat{u}(\lambda)$  (i.e. the size dependent steady-state velocity) and the expansion coefficients  $\{\hat{\mathbf{A}}_n\}$  for the case where no net force acts on the sphere. Truncating the summations in Eqns. (S1) at some even  $n = n_{\max}$  and taking into account the first  $n_{\max} + 2$  equations up to  $k_{\max} = (n_{\max} + 2)/2 - 1$  yields a closed system that determines the  $n_{\max} + 2$  unknowns  $(\hat{u}, a_0, a_2, \dots, a_{n_{\max}}, b_2, b_4, \dots, b_{n_{\max}})$ , which directly yield  $\{\hat{\mathbf{A}}_n\}_{n=2,4,\dots,n_{\max}}$  via Eqns. (S2a)-(S2d). The physical steady state velocity of the advected sphere for a particular peak flow velocity  $u$  in the channel is then determined by  $v(\lambda) = u/\hat{u}(\lambda)$ . We have checked that the coefficients converge when  $n_{\max}$  is increased. As shown in the following, the absolute values of  $(\hat{A}_n, \hat{B}_n, \hat{C}_n, \hat{D}_n)$  additionally decrease for larger  $n$ , which justifies the suggested truncation scheme.

### Evaluation of expansion coefficients and hydrodynamic stresses for different $\lambda$ .

Fig. S1 shows the amplitudes of the coefficient vector  $|\hat{\mathbf{A}}_n| = \sqrt{\hat{A}_n^2 + \hat{B}_n^2 + \hat{C}_n^2 + \hat{D}_n^2}$ , normalized by its maximum at  $n = 2$ . The expansion coefficients decay slower with  $n$  for larger  $\lambda$ .

This represents the increasingly complex interaction with the wall for larger spheres. Depending on the application, one can then choose an appropriate threshold to truncate the series. In this work we have chosen to neglect terms with  $|\hat{\mathbf{A}}_n|/|\hat{\mathbf{A}}_2| < 10^{-4}$ . This threshold leads to a numerical precision of the derived hydrodynamic surface stresses  $\sigma_{ij}^H/\sigma_c$  of approximately  $10^{-3}$ , which suffices for experimental purposes.

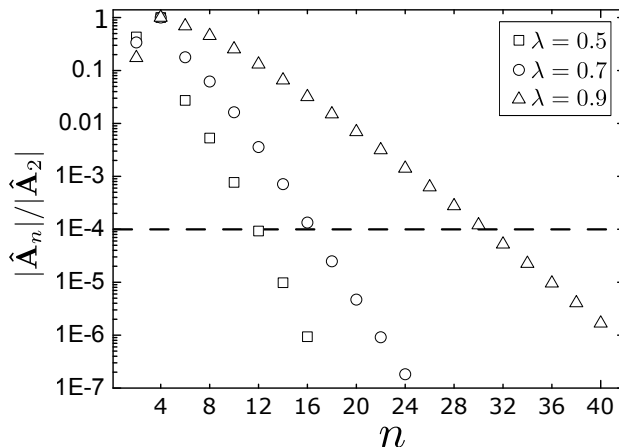

FIG. S1: Normalized absolute value of the coefficient vectors  $\hat{\mathbf{A}}_n$  used in the stream function for different  $\lambda$ . For the shown data we neglected all coefficients with  $|\hat{\mathbf{A}}_n|/|\hat{\mathbf{A}}_2| < 10^{-4}$ . This threshold is depicted by the dashed line, which shows that more and more terms have to be included for the same numerical precision, when  $\lambda$  is increased.  $\hat{\mathbf{A}}_n = 0$  for odd  $n$ .

Figure S2 depicts the values of the expansion coefficients  $f_n$  and  $g_n$  as given by Eqns. S3a and S3b for different  $\lambda$ . As mentioned before,  $f_n = g_n = 0$  for even  $n$ , which is a consequence of the symmetry of the flow solution. Their amplitudes increase for greater values of  $\lambda$ , which represents an increase in stress, if the object's size is increased and all other experimental parameters are left constant.

Fig. S3 shows the stress amplitudes for  $\lambda = 0.9$ . All other parameters are as for Figure 3A in the main text. Despite the overall increase of stress amplitudes, the vicinity of the channel walls now leads to much more pronounced effects on surface regions around  $\theta = \pi/2$  compared to  $\lambda = 0.7$ . Again those results are verified by the Finite-Element method.



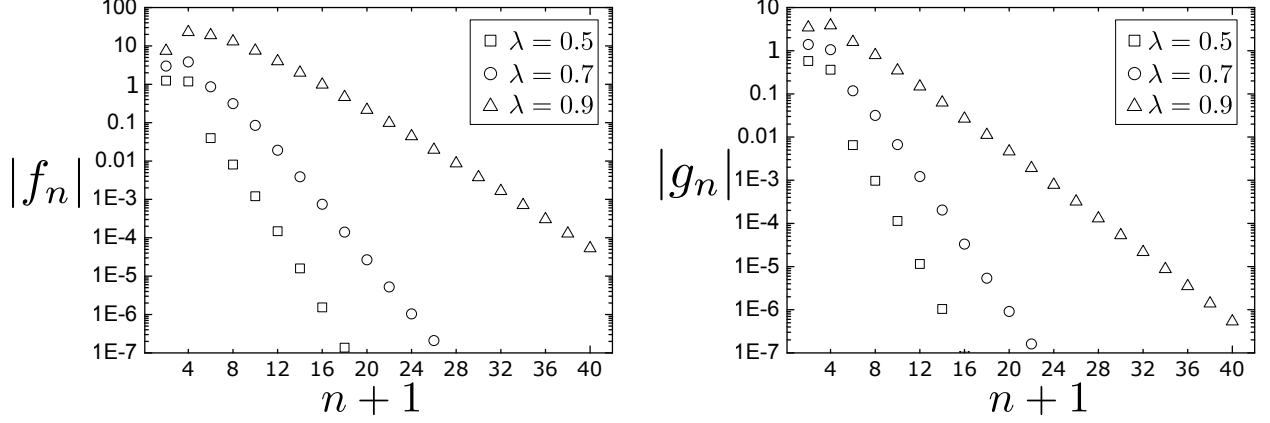

FIG. S2: Expansion coefficients of the hydrodynamic stresses on the surface of the sphere for different  $\lambda$ .  $f_n$  relates to pressure,  $g_n$  relates to shear stresses. Decay properties are very similar to those of the stream function coefficients Fig. S1. Increasing  $\lambda$  leads to an overall increase of coefficient amplitudes and hence stress, when experimental conditions (Flow rate  $Q$  and viscosity  $\eta$ ) are kept constant.  $f_n = g_n = 0$  for even  $n$ .

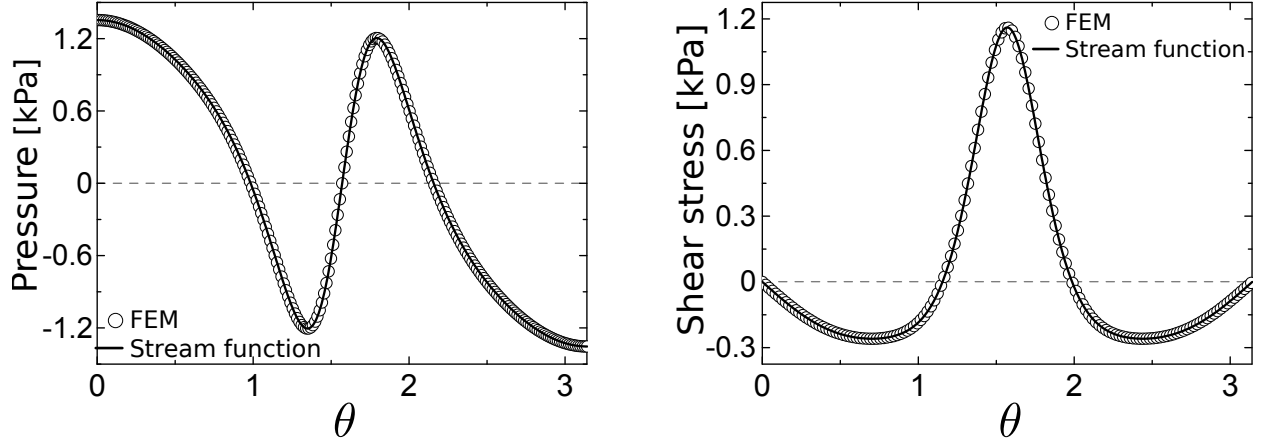

FIG. S3: Hydrodynamic pressure (left) and shear stress (right) for  $\lambda = 0.9$ . Solid line shows results from the stream function approach for  $Q = 0.012 \mu\text{l/s}$  and  $\eta = 0.015 \text{ mPa} \cdot \text{s}$  (typical experimental parameters, as used in Fig. 3B (main text)) and channel radius  $R = 10 \mu\text{m}$ . While the essential characteristics are still given by the 1st and 3rd Legendre polynomials and their derivatives, normal and tangential stress amplitudes increase by a factor of 2 and 4, respectively, compared to  $\lambda = 0.7$ . The strong stress gradients around  $\pi/2$  (near the channel walls) lead to the bulge and groove for deformed shapes shown in Fig. 4A (main text).

### S3. EQUIVALENT CHANNEL RADIUS

To map the situation of a steady flow in a channel with square cross-section of side length  $L$  onto the problem of a steady flow in a cylindrical channel with radius  $R_{eq}$ , we take the following approach: we derive a factor  $C$  with  $2R_{eq} = C \cdot L$  such that the pressure drop is the same in the circular channel as in the square channel. Textbook results for the fluid flow through channels with circular and square cross-section [3] can be used to derive

$$C = 2\sqrt[4]{\frac{2K_1}{3\pi}} \approx 1.094$$

with

$$K_1 = 1 - 6 \sum_{n=1}^{\infty} \frac{\tanh(\omega_n)}{\omega_n^5} \text{ with } \omega_n = (2n - 1)\frac{\pi}{2}.$$

This defines  $\lambda_{eq} = r_0/R_{eq}$  and we can identify the different geometries by  $\lambda = \lambda_{eq}$ .

### S4. LEGENDRE POLYNOMIALS

We solve the stream function, stress components and displacements fields of the advected elastic spherical object in terms of an expansion of Legendre polynomials. The defining differential equation of Legendre polynomials  $P_n(x)$ ,  $x \in [-1, 1]$  reads

$$\frac{d}{dx} \left[ (1 - x^2) \frac{dP_n(x)}{dx} \right] + n(n + 1)P_n(x) = 0. \quad (\text{S4})$$

To derive most of the equations related to displacement calculations in all models, we have to make use of an identity that follows directly from (S4) by substituting  $x \rightarrow \cos \theta$  and reads

$$\frac{d^2 P_n(\cos \theta)}{d\theta^2} = - \left( \cot \theta \frac{dP_n(\cos \theta)}{d\theta} + n(n + 1)P_n(\cos \theta) \right).$$

### S5. EQUILIBRIUM EQUATIONS OF LINEAR ELASTICITY IN SPHERICAL COORDINATES

For the sake of completeness, we state the equilibrium equation of linear elasticity in spherical coordinates, i.e. the components of

$$\nabla \cdot \boldsymbol{\sigma} = 0 \quad (\text{S5})$$

where  $\nabla$  represents the covariant derivative the stress tensor  $\boldsymbol{\sigma}$ . The components of Eq. (S5) in spherical coordinates read [4]

$$\begin{aligned} \frac{\partial \sigma_{rr}}{\partial r} + \frac{1}{r} \frac{\partial \sigma_{r\theta}}{\partial \theta} + \frac{1}{r \sin \theta} \frac{\partial \sigma_{r\varphi}}{\partial \varphi} + \frac{2\sigma_{rr} - \sigma_{\theta\theta} - \sigma_{\varphi\varphi} + \sigma_{r\theta} \cot \theta}{r} &= 0 \\ \frac{\partial \sigma_{r\theta}}{\partial r} + \frac{1}{r} \frac{\partial \sigma_{\theta\theta}}{\partial \theta} + \frac{1}{r \sin \theta} \frac{\partial \sigma_{\theta\varphi}}{\partial \varphi} + \frac{3\sigma_{r\theta} + (\sigma_{\theta\theta} - \sigma_{\varphi\varphi}) \cot \theta}{r} &= 0 \\ \frac{\partial \sigma_{r\varphi}}{\partial r} + \frac{1}{r} \frac{\partial \sigma_{\theta\varphi}}{\partial \theta} + \frac{1}{r \sin \theta} \frac{\partial \sigma_{\varphi\varphi}}{\partial \varphi} + \frac{3\sigma_{r\varphi} + 2\sigma_{\theta\varphi} \cot \theta}{r} &= 0. \end{aligned}$$

Stress-strain relations for an isotropic, linearly elastic material read in all coordinates [6]

$$\sigma_{ij} = 2G \left( \epsilon_{ij} + \frac{\nu}{1 - 2\nu} \delta_{ij} \epsilon_{kk} \right). \quad (\text{S6})$$

The components of the strain tensor relevant for the calculations of surface stresses relate to the displacement fields by

$$\epsilon_{rr} = \frac{\partial u_r}{\partial r} \quad \epsilon_{\theta\theta} = \frac{1}{r} \frac{\partial u_\theta}{\partial \theta} + \frac{u_r}{r} \quad \epsilon_{r\theta} = \epsilon_{\theta r} = \frac{1}{2} \left( \frac{\partial u_\theta}{\partial r} - \frac{u_\theta}{r} + \frac{1}{r} \frac{\partial u_r}{\partial \theta} \right). \quad (\text{S7})$$

## S6. THE PAPKOVICH-NEUBER ANSATZ

Solutions to the force balance equation (S5) can in general be given by a Papkovich-Neuber ansatz [7]

$$\mathbf{u} = 4(1 - \nu)\mathbf{B} - \nabla(\mathbf{r} \cdot \mathbf{B} + B_0), \quad (\text{S8})$$

where  $\mathbf{B}$  and  $B_0$  are a harmonic vector and a harmonic scalar potential, i.e.  $\nabla^2 \mathbf{B}$  and  $\nabla^2 B_0$  vanish. A harmonic scalar  $B_0$  in spherical coordinates with azimuthal symmetry can be written as [4]

$$B_0 = \sum_{n=0}^{\infty} \left[ \bar{a}_n r^n + \frac{\bar{b}_n}{r^{n+1}} \right] P_n(\cos \theta).$$

Harmonic vectors in spherical coordinates with azimuthal symmetric components can be derived by making the ansatz

$$B_r = \sum_{\substack{n=0 \\ k=-\infty}}^{\infty} a_{nk} r^k P_n(\cos \theta) \quad \text{and} \quad B_\theta = \sum_{\substack{n=1 \\ l=-\infty}}^{\infty} b_{nl} r^l \frac{dP_n(\cos \theta)}{d\theta}$$

in the vector Laplace equation  $\nabla^2 \mathbf{B} = 0$ . Taking into account the orthogonality of the Legendre polynomials, we find a biquadratic equation in  $l = k$ , which yields expansions of

the components of  $\mathbf{B}$  of the form

$$B_r = \sum_{n=0}^{\infty} \left[ n\bar{c}_n r^{n-1} - (n+1) \frac{\bar{d}_n}{r^{n+2}} \right] P_n(\cos \theta) \quad (\text{S9})$$

$$B_\theta = \sum_{n=1}^{\infty} \left[ \bar{c}_n r^{n-1} + \frac{\bar{d}_n}{r^{n+2}} \right] \frac{dP_n(\cos \theta)}{d\theta} \quad (\text{S10})$$

and

$$B_r = \sum_{n=0}^{\infty} \left[ -\bar{e}_n (n+1) r^{n+1} + n \frac{\bar{f}_n}{r^n} \right] P_n(\cos \theta)$$

$$B_\theta = \sum_{n=1}^{\infty} \left[ \bar{e}_n r^{n+1} + \frac{\bar{f}_n}{r^n} \right] \frac{dP_n(\cos \theta)}{d\theta}.$$

Note that Eqns. (S9) and (S10) are directly proportional to the respective components of  $\nabla B_0$  and therefore they do not yield a new independent solution in the Papkovitch-Neuber ansatz. The coefficients of the displacement fields used in Eqns. (8a) and (8b) (main text),  $a_n$  and  $b_n$ , relate to the potentials discussed here by  $a_n = \bar{e}_n$  and  $b_n = \bar{a}_n$ , as those are the only independent terms that converge for  $r \rightarrow 0$ . The terms associated with  $\bar{b}_n$  and  $\bar{f}_n$  can be used in the Papkovitch-Neuber ansatz to calculate elastic deformations of thick shells, as for example in [5].

## S7. POLAR REPRESENTATION

Figure S4 sketches the geometry we have to consider to derive a polar representation of the deformed shape. We have

$$\varrho(\theta) = \sqrt{[r_0 + u_r(\theta')]^2 + u_\theta(\theta')^2} = r_0 + u_r(\theta') + \mathcal{O}(u^2/r_0). \quad (\text{S11})$$

Additionally we have to include the shift in the angle  $\theta = \theta' + \Delta\theta'$ , that results from tangential displacements:

$$\tan(\Delta\theta') = \frac{u_\theta(\theta')}{r_0 + u_r(\theta')} \Rightarrow \theta' = \theta - \frac{u_\theta(\theta')}{r_0} + \mathcal{O}(u^2/r_0). \quad (\text{S12})$$

Plugging Eq. (S12) into Eq. (S11) we find  $\varrho(\theta)$  and it takes the form  $\varrho(\theta) = r_0 + u_r(\theta) + \mathcal{O}(u^2/r_0)$ , i.e. other than the radial displacements  $u_r$ , tangential displacements  $u_\theta$  only contribute to second order to a polar representation of the shape.

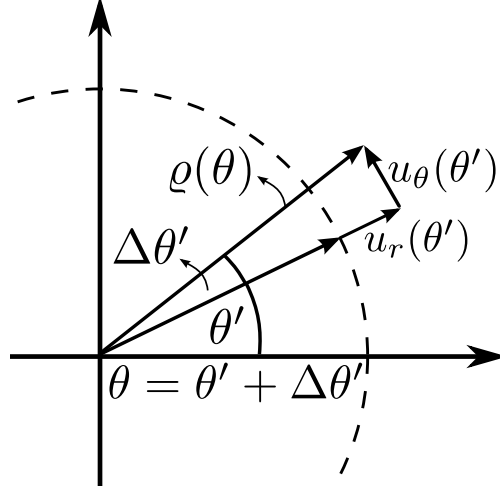

FIG. S4: Conversion between polar shape representation  $\varrho(\theta)$  and deformation in terms of displacement fields  $u_r(\theta')$  and  $u_\theta(\theta')$ .  $\varrho(\theta)$  relates to the displacement fields  $u_r$  and  $u_\theta$  given at  $\theta' = \theta - \Delta\theta'$  in a non-trivial way.

## S8. ERROR ESTIMATE OF HYDRODYNAMIC SURFACE STRESS AND ESTIMATED YOUNG'S MODULUS

Here, we estimate the error in the surface stress of an advected sphere that stems from neglecting the feedback of elastic deformation on the surrounding fluid flow. For this purpose, we placed shapes of a deformed solid elastic sphere and a deformed shell depicted in Figure 4A (main text) ( $\lambda = 0.7$ ,  $d = 0.006$ ) as rigid bodies into a cylindrical channel implementing a finite-element simulation using COMSOL Multiphysics [11]. The velocity of the deformed shape was chosen such that the net force vanishes within numerical precision. The resulting stress profile  $\sigma^d$  on the surface of the deformed shapes  $\mathbf{r}_d(\theta) = r_0\mathbf{e}_r(\theta) + \mathbf{u}(\theta)$  was compared to the stress  $\sigma^u$  on the undeformed sphere  $\mathbf{r}_0(\theta) = r_0\mathbf{e}_r(\theta)$  at equal values of  $\theta$  for normal stresses  $\sigma_n^d$  and shear stresses  $\sigma_s^d$ , respectively. Note, that this mapping between  $\mathbf{r}_0$  and  $\mathbf{r}_d$  is unique. The resulting profiles are shown in Figure S5A and B. We estimate the relative stress errors as  $\delta_i = |\sigma_i^d - \sigma_i^u| / (\sigma_{i,\max}^u - \sigma_{i,\min}^u)$  ( $i = n, s$ ), where  $\sigma_{i,\max}^u$  and  $\sigma_{i,\min}^u$  denote the maximal and minimal value of stress on the surface of the undeformed, advected sphere (see Fig. S5C). For the deformed solid elastic sphere, we find that the stress deviates nowhere on the surface more than 9% and on average only about 3.5%. For the deformed shell the deviations are slightly larger, with  $\delta_s$  reaching up to 16%. However, the surface

regions where those values occur (close to the channel walls) represent a rather small fraction of the whole surface, such that the average deviations are less than 7%.

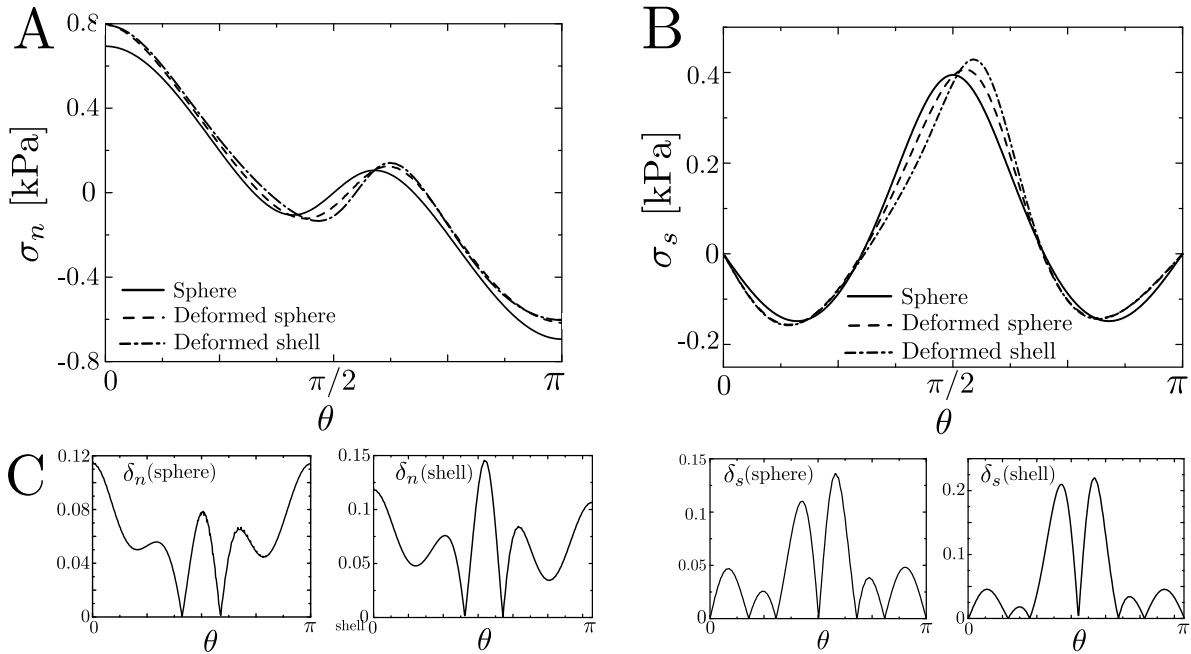

FIG. S5: Comparison of surface stresses  $\sigma^u$  and  $\sigma^d$  on undeformed (solid lines) and deformed shapes (dashed and dot-dashed lines). Objects were advected at steady state in a Poiseuille flow at low Reynold's number. The deformed shapes were generated as a first order deformation of a solid elastic sphere and a thin elastic shell with  $\lambda = 0.7$  (see Fig. 4, main text) and dimensional parameters were as Figure 3 (main text): sphere radius  $r_0 = 7 \mu\text{m}$ , channel radius  $R = 20 \mu\text{m}$ , flow rate  $Q = 0.012 \mu\text{l/s}$ , viscosity  $\eta = 0.015 \text{ Pa}$ . (A) Normal hydrodynamic stress. (B) Hydrodynamic shear stress. (C) Deviations  $\delta_i = |\sigma_i^d - \sigma_i^u| / (\sigma_{i,\text{max}}^u - \sigma_{i,\text{min}}^u)$  for normal stress  $i = n$  (left) and shear stresses  $i = s$  (right).

We performed the same analysis for shapes with deformations  $d = \{0.01, 0.02, 0.025\}$  and find that the relative error increases with increased deformation (Table S1). Maximal deviations are generally larger on a deformed shell, as compared to a deformed solid elastic sphere of equal deformation and they are localized to surface regions that are close to the channel walls. Due to this localisation the average error across the surface on an elastic shell shape stays small ( $< 12\%$ ) within the regime of deformations considered in this work.

To confirm that small errors in surface stresses correspond to small errors in estimated elastic moduli when fitting our analytic theory to experimental shapes, we employed a

|                                             | $d = 0.006$ | $d = 0.01$ | $d = 0.02$   | $d = 0.025$  |
|---------------------------------------------|-------------|------------|--------------|--------------|
| $\delta_n^{\max}, \delta_s^{\max}$ (sphere) | 7 %, 9 %    | 9 %, 12 %  | 12 %, 18 %   | 14 %, 21 %   |
| $\delta_n^{\max}, \delta_s^{\max}$ (shell)  | 8 %, 16 %   | 12 %, 21 % | 19 %, 30.5 % | 20 %, 33 %   |
| $\bar{\delta}_n, \bar{\delta}_s$ (sphere)   | 3 %, 3.5 %  | 3 %, 4.5 % | 4 %, 6.5 %   | 4.5 %, 7.5 % |
| $\bar{\delta}_n, \bar{\delta}_s$ (shell)    | 4 %, 6.5 %  | 4 %, 8 %   | 5 %, 11.5 %  | 7 %, 11.5 %  |

TABLE S1: Relative errors of hydrodynamic stresses on surfaces of deformed shapes as calculated with the model of a solid elastic sphere (sphere) and a thin elastic shell (shell) for different values of deformation  $d$ .  $\delta_i^{\max}$  depicts maximal deviation that occur on surface regions close to the cylinder walls  $\bar{\delta}_i$  depict deviations averaged over the surface.

fully coupled finite element simulations of a linearly elastic sphere advected in a cylindrical channel (see Sec. S12). This simulation takes into account the coupling between deformation and changes in the surrounding flow field. We used it to generate steady-state shapes for typical experimental parameters, which then were fitted using our analytical theory of an elastic sphere (Fig. S6). For increasing deformations one can identify shape features in the finite-element model that can not completely be captured by the analytical theory, as the changes in the hydrodynamic stresses due to the deformation becomes more relevant (see Table S1). However, when fitting our analytical theory to those shapes the elastic moduli put in the phase field model are quantitatively still very well reproduced with relative errors of less than 4%.

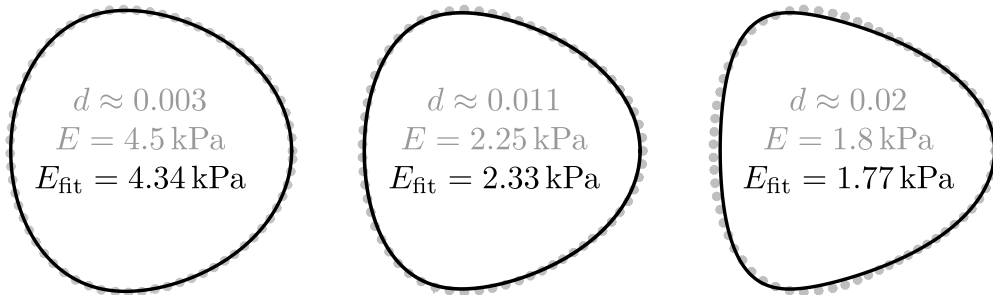

FIG. S6: Fitting of shapes from a fully coupled finite element simulation (see Sec. S12). Steady-state shapes with different deformations were generated using a numerical phase field model (see Sec. S12) (gray dots). The contours were fitted using our analytical theory (solid lines) resulting in a predicted elastic modulus  $E_{\text{fit}}$ . For all three shapes we have  $\lambda \approx 0.7$ ,  $Q = 0.012 \mu\text{l/s}$ ,  $\eta = 15 \text{ mPa} \cdot \text{s}$  and a channel radius  $R = 10 \mu\text{m}$ .



## S9. AFM INDENTATION EXPERIMENTS.

Agar films were prepared using the same agar solution as for the beads. 600  $\mu\text{l}$  of agar solution were cast into a petri dish (34 mm  $\varnothing$ , TPP Switzerland). Agarose films were then covered with PBS (1 ml) for at least 2 hours before starting the measurement. For the AFM indentation experiments a nanowizard I (JPK Instruments, Berlin) equipped with Cellhesion Module was used. Arrow-T1 cantilevers (Nanoworld, Neuchatel) that had been modified with a polystyrene bead of 10  $\mu\text{m}$  diameter (microparticles GmbH, Berlin) were calibrated prior measurements using the thermal noise method. To determine the stiffness of the agarose films, the cantilever was lowered with a speed of 5  $\mu\text{m/s}$  onto the agarose surface until a relative setpoint of 2.5 nN was reached. The resulting force distance curves were analysed using the JPK image processing software (JPK instruments). Force distance data were corrected for the tip sample separation [10] and fitted with a Hertz model fit for a spherical indenter [8]. A Poisson ratio of 0.5 was assumed (See Sec. S10). Experiments were carried out in PBS and at room temperature. Similar methodical settings were used for indentation experiments on HL60 cells. Arrow -T1 cantilevers were modified with a polystyrene bead of 5  $\mu\text{m}$  diameter and lowered with a speed of 5  $\mu\text{m/s}$  onto the cell surface until a relative setpoint of 2 nN was reached. Force distance data were analyzed as mentioned above. Experiments were carried out at 37°C in CO<sub>2</sub> independent medium (life technologies, Darmstadt) within 1.5 hours.

## S10. INFLUENCE OF POISSON RATIO ON FITTED ELASTIC MODULI

In AFM indentation measurements, the Hertz model is used to fit the elastic modulus  $E^* = E/(1 - \nu^2)$ , where  $E$  is the Young's modulus and  $\nu$  is the Poisson ratio [8]. Therefore, assuming a different Poisson ratio  $\nu'$  leads to a different estimate of the Young's Modulus  $E' = E(1 - \nu'^2)/(1 - \nu^2)$ .

For the fitting of data acquired using RT-DC, we assumed incompressibility of beads and cells ( $\nu = 0.5$ ). This is motivated by their large water content together with the very short measurement times of RT-DC ( $\approx 1$  ms) which render it unlikely that water fluxes into and out of the cell play a major role. In order to examine the influence of different choices of  $\nu$  on our estimate of Young's moduli  $E$ , we have performed the same data analysis using  $\nu = 0.3$

and  $\nu = 0.4$ . The results are shown in Table S2. We conclude that changing values of the

|                             | $\nu = 0.3$      | $\nu = 0.4$      | $\nu=0.5$                          |             |
|-----------------------------|------------------|------------------|------------------------------------|-------------|
| Agarose film (AFM, bulk)    | $2.5 \pm 0.1$    | $2.31 \pm 0.09$  | <b><math>2.06 \pm 0.08</math></b>  | kPa         |
| Agarose beads (RT-DC, bulk) | $1.71 \pm 0.92$  | $1.89 \pm 1.02$  | <b><math>2.15 \pm 1.10</math></b>  | kPa         |
| HL60 cells (AFM, bulk)      | $206 \pm 103$    | $190 \pm 95$     | <b><math>170 \pm 85</math></b>     | Pa          |
| HL60 cells (RT-DC, bulk)    | $1.11 \pm 0.44$  | $1.24 \pm 0.50$  | <b><math>1.48 \pm 0.51</math></b>  | kPa         |
| HL60 cells (RT-DC, shell)   | $21.47 \pm 7.88$ | $22.64 \pm 8.16$ | <b><math>23.69 \pm 8.42</math></b> | nN/ $\mu$ m |

TABLE S2: Estimated Young’s moduli for beads and cells under the assumption of different Poisson ratios  $\nu$  (mean  $\pm$  standard deviation). (legend: AFM, bulk - measured with AFM indentation using the Hertz model, RT-DC, bulk - RT-DC measurement fitted using the model of an isotropic elastic sphere, RT-DC, shell - RT-DC measurement fitted using the model of an isotropic elastic thin shell)

Poisson ratio  $\nu$  within the interval  $[0.3, 0.5]$  does not change the Young’s modulus estimate by orders of magnitude but only up to 25%. Therefore, it cannot explain the difference in Young’s moduli obtained from AFM and RT-DC measurements on cells. However, a change of Poisson ratios gives rise to opposing trends for AFM and RT-DC measurements. While assuming lower values for the Poisson ratio increases the extracted Young’s modulus in AFM measurements, it decreases Young’s moduli extracted from RT-DC measurements.

### S11. DISTRIBUTION OF STIFFNESS VALUE IN AFM INDENTATION AND RT-DC MEASUREMENTS

We measured cells of a human promyelocytic cell line (HL60) in an RT-DC setup and analyzed deformed cell shapes just as in the case of deformed agar beads described above (see Fig. 5, main text). Employing the cell mechanical model of an isotropic elastic sphere, we obtain on average a cell elastic modulus of  $E = 1.47 \pm 0.51$  kPa (N=281, mean $\pm$ SD). Performing AFM indentation experiments on the cells, we find on average a Young’s modulus of  $E = 170 \pm 85$  Pa (N=169). Associated distributions of measured cell elastic moduli are shown in Fig. S7. While the means of AFM and RT-DC measurements are different, the distributions of measurement points show similar characteristics. In particular, distri-

butions exhibit a long tail towards higher elastic moduli. This similarity of distributions may indicate that elastic moduli are simply scaled by a constant factor when changing from one measurement technique to the other, something that might be accounted for by the time-scale dependence of cell mechanics [12].

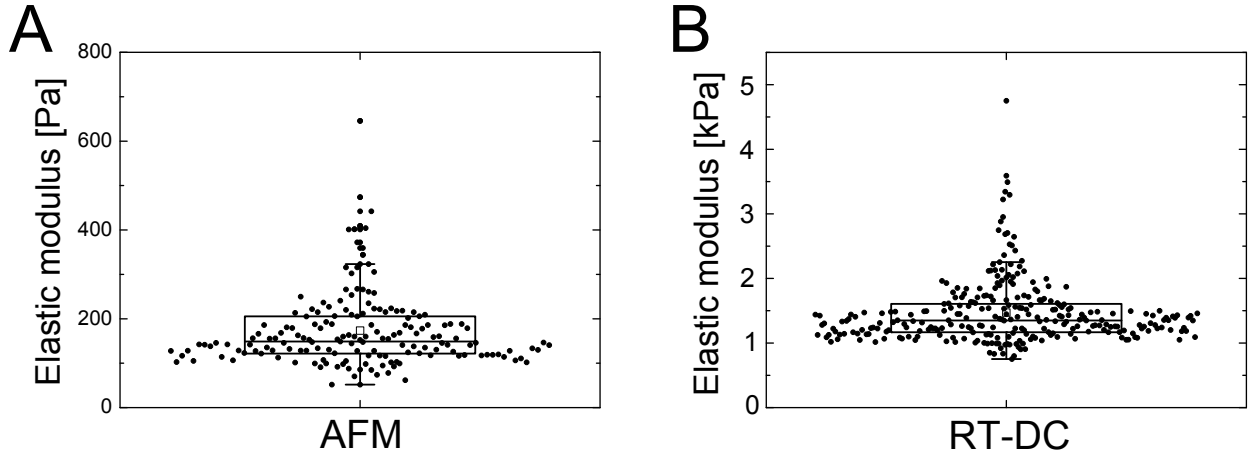

FIG. S7: Distribution of elastic moduli measured with AFM and RT-DC. (A) AFM indentation experiments ( $N = 169$ ,  $E = 170 \pm 85$  Pa). (B) RT-DC experiment ( $N = 281$ ,  $E = 1.47 \pm 0.51$  kPa).

## S12. FULLY COUPLED FINITE ELEMENT SIMULATIONS

To verify the predicted shapes of our analytic theory, we finally conduct finite element simulations that take into account the coupling between flow field and elastic deformation. Our simulations rely on the Stokes equation for the fluid phase (carrier medium) and linear elasticity theory for an incompressible elastic solid.

The computational method employed is based on a phase field approach, first described in [13]. The elastic sphere and the surrounding fluid are discretized on a common grid and a phase field  $\phi$  is used to distinguish between the phases, i.e.  $\phi = 1$  in the fluid,  $\phi = 0$  in the cell. Thereby the stationary Stokes equation (1)-(2) can be extended over the full domain, including the elastic stress tensor  $\boldsymbol{\sigma}$  in the region where  $\phi = 0$ .

$$\begin{aligned}\nabla p - \eta \nabla^2 \mathbf{v} &= \nabla \cdot ((1 - \phi) \boldsymbol{\sigma}) \\ \nabla \cdot \mathbf{v} &= 0\end{aligned}$$

In the fluid phase ( $\phi = 1$ ) we recover the original Stokes equation (1)-(2). In the cell region ( $\phi = 0$ ) in the stationary limit ( $\mathbf{v} = 0$ ) we recover the equation of linear elasticity of an

incompressible material. The use of a common grid here offers several advantages: no re-gridding is needed and the implicit inclusion of the stress balance between viscous fluid and elastic solid, stabilizes the coupling. Further, the elastic stress evolves according to

$$\partial_t \boldsymbol{\sigma} + (\mathbf{v} - \mathbf{v}_c) \cdot \nabla \boldsymbol{\sigma} - \nabla \mathbf{v} \cdot \boldsymbol{\sigma} - \boldsymbol{\sigma} \cdot \nabla \mathbf{v}^T = \frac{E_0}{6} (\nabla \mathbf{v} + \nabla \mathbf{v}^T) - k\phi \boldsymbol{\sigma}.$$

where  $E_0 = 1 \text{ kPa}$  is a reference Young's modulus and we added a penalty constant  $k = 10^6 \text{ s}^{-1}$  to enforce vanishing stress in the fluid region. Note, that we have subtracted the cell velocity  $\mathbf{v}_c$  (computed from the last respective time step) in the advection terms to keep the cell in the middle of our computational domain.

Finally, the phase field is moved with the flow by an advected Cahn-Hilliard equation.

$$\begin{aligned} \partial_t \phi + (\mathbf{v} - \mathbf{v}_c) \cdot \nabla \phi &= M \nabla^2 \mu, \\ \mu &= \epsilon^{-1} (4\phi^3 - 6\phi^2 + 2\phi) - \epsilon \nabla^2 \phi \end{aligned}$$

The included 4th order diffusion with mobility constant  $M = 10 \text{ mm}^3/\text{s}$  ensures that the phase field keeps the distinct values of 0 and 1 in the two phases with a smooth but rapid transition at the interface. The thickness of the transition region is controlled by the parameter  $\epsilon = 0.05 \text{ } \mu\text{m}$  [14].

As initial condition we use a spherical bubble (for  $\phi$ ), poissonuille flow (for  $\mathbf{v}$ ) and zero elastic stress ( $\boldsymbol{\sigma} = 0$ ). We prescribe a pressure difference between in- and outflow as boundary condition. This pressure difference is iteratively adapted such as to obtain a prescribed value for  $E$  (see Fig. S6) according to the rescaling introduced on page 13, main text.

Consistently with the analytical calculations we consider an axisymmetric setting here which reduces the problem to a two-dimensional computational domain  $\Omega = [0, 40] \mu\text{m} \times [0, 10] \mu\text{m}$ . Axisymmetric versions of the above evolution equations can be found in [15, 16].

We solve the time-dependent problem with a time step of  $1 \mu\text{s}$  until the bubble shape has reached an (almost) stationary state. The computational grid is adaptively controlled such that the grid size is  $0.1 \mu\text{m}$  close to the cell boundary and  $0.8 \mu\text{m}$  further away from it. More details on the numerical discretization with the Finite-Element toolbox AMDiS can be found in [14].

- 
- [1] Happel, J. & H. Brenner *Low Reynolds Number Hydrodynamics* (Nordhoff International Publishing, 1973)
- [2] Haberman, L. & R. Sayre Motion of rigid and fluid spheres in stationary and moving liquids inside cylindrical tubes. *D. Taylor (Ed.), Model Basin Rep.* (1958).
- [3] Bruus, H. *Theoretical microfluidics* (OUP Oxford, 2008), 1 edition
- [4] Arfken, G.B. & Weber, H.J. *Mathematical Methods for Physicists* (Elsevier Ltd., 2005), 3 edition
- [5] Ananthakrishnan, R. *et al.* Quantifying the contribution of actin networks to the elastic strength of fibroblasts. *J. Theor. Biol.* **242**, 502 – 516 (2006).
- [6] Landau, L. & E. Lifshitz *Theory of Elasticity* (Elsevier Ltd., 1986), 3 edition
- [7] Lurie, A. I. *Theory of Elasticity* (Springer, 2005), 1 edition
- [8] Sneddon, I. N. The relation between load and penetration in the axisymmetric boussinesq problem for a punch of arbitrary profile. *International Journal of Engineering Science* **3**, 47–57 (1965).
- [9] Otto, O. *et al.* Real-time deformability cytometry: High-throughput cell mechanical phenotyping on-the-fly. *Nat Met* **12**, 199-202 (2015).
- [10] Domke, J. & M. Radmacher Measuring the elastic properties of thin polymer films with the atomic force microscope. *Langmuir* **14**, 3320–3325 (1998).
- [11] [www.comsol.com](http://www.comsol.com)
- [12] Kollmannsberger, P., and B. Fabry. Linear and nonlinear rheology of living cells. *Ann Rev Mater Res* **41**, 75–97 (2011).
- [13] Sun, P., J. Xu and L. Zhang. Full Eulerian finite element method of a phase field model for fluid-structure interaction problem. *Computers & Fluids* **90**, 1–8 (2014).
- [14] Aland, S., and A. Voigt. Benchmark computations of diffuse interface models for two-dimensional bubble dynamics. *Int J Numer Meth Fl* **69**, 747–761 (2012).
- [15] Aland, S. *et al.* Modeling and numerical approximations for bubbles in liquid metal. *Eur Phys J Spec Top* **220**, 185–194 (2013).
- [16] Tomé, M. *et al.* Die-swell, splashing drop and a numerical technique for solving the Oldroyd B model for axisymmetric free surface flows. *J Non-Newton Fluid* **141**, 148–166 (2007).
